# Supplementary material for: Copper(i)-catalyzed coupling of alkynyl glycosides: synthesis of buta-1,3-diyne-linked disaccharides and dinucleosides
Source: Royal Society of Chemistry journal article supplement (doi:10.1039/d4ob01872a), 2025-01-01

## Supporting Information

### Copper (I) Catalyzed Coupling of Alkynyl Glycosides: Synthesis of Buta-1,3-Diyne Linked Disaccharides and Dinucleosides

Junaid Shafi Banday,<sup>a,b</sup> Sajjad Ahmed<sup>a,b</sup> and Qazi Naveed Ahmed<sup>a,b,\*</sup>

<sup>a</sup>Natural Products and Medicinal Chemistry Division, CSIR Indian Institute of Integrative Medicine, Canal Road Jammu 180001

<sup>b</sup>Academy of Scientific and Innovative Research (AcSIR), Ghaziabad-201002, India

\*Email: naqazi@iiim.ac.in

| Table of Content                   | Page no |
|------------------------------------|---------|
| Experimental Section.....          | S2      |
| Analytical data for compounds..... | S3-S15  |
| NMR spectra for compounds.....     | S16-S37 |



## Experimental Section

### 1.0 General information:

All the reactions were performed in a 50 ml round bottom flask at room temperature.  $^1\text{H}$  and  $^{13}\text{C}$  NMR spectra were recorded on 400 MHz spectrometers with TMS as internal standard. Chemical shifts are expressed in parts per million ( $\delta$  ppm). Signal multiplicities are represented by the following abbreviations: (s = singlet, d = doublet, t = triplet, q = quartet, m = multiplet, dd = double doublet), coupling constant ( $J$  values) in Hz and integration. Silica gel coated aluminum plates were used for TLC. The products were purified by column chromatography on silica gel (100-20 mesh) using Hexane-ethyl acetate as the eluent to obtain the pure products. Exact mass of all products was analyzed by using HRMS having QTOF analyzer. Optical rotations were measured on a Rudolph Research Analytical, Autopol I. Reagents used were mostly purchased from Sigma Aldrich and TCI.

**1.1 General procedure for the synthesis of buta-1,3-diyne linked disaccharides using alkynyl glycosides:** To the stirred solution of alkynyl glycosides in DCE was added appropriate amount of aniline followed by catalytic addition of copper (I) bromide at room temperature. The reaction mixture was stirred under atmospheric air at same temperature for 12 hours. After the formation of the product as judged by the TLC, the reaction mixture was quenched by 1N HCl until the reaction mixture became neutral, which was extracted using ethyl acetate (3 times). The collected organic layers were dried over anhydrous sodium sulphate, concentrated under reduced pressure and purified by flash chromatography (4-30% ethyl acetate in hexane) on silica gel to provide products generally as yellowish/whitish gummy type solid/oil.



## 2.0 Analytical data for compounds

### 1,6-bis(((3aR,4R,6R,6aR)-6-methoxy-2,2-dimethyltetrahydrofuro[3,4-d][1,3]dioxol-4-yl)methoxy)hexa-2,4-diyne (**2a**)

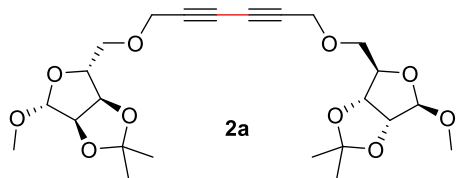

Prepared by dissolving 50 mg alkynyl glycoside (0.20 mmol) in 4 ml of DCE followed by addition of aniline (9  $\mu$ l, 0.1 mmol) and copper (I) bromide (3 mg, 0.02 mmol) at room temperature for 12 hours and purified by flash chromatography (5-10% EtOAc/Petroleum ether) on silica gel (mesh size 100-200) to obtain **2a** in 65% (32 mg) as a yellowish gummy type solid.

**$^1\text{H}$  NMR (400 MHz,  $\text{CDCl}_3$ ):**  $\delta$  4.90 (d,  $J$  = 1.0 Hz, 2H), 4.59 (d,  $J$  = 6.0 Hz, 2H), 4.51 (d,  $J$  = 5.9 Hz, 2H), 4.25 (t,  $J$  = 7.2 Hz, 2H), 4.20 (s, 4H), 3.56 – 3.50 (m, 2H), 3.46 – 3.39 (m, 2H), 3.27 (s, 6H), 1.41 (s, 6H), 1.23 (d,  $J$  = 12.2 Hz, 6H)

**$^{13}\text{C}$  NMR (101 MHz,  $\text{CDCl}_3$ ):**  $\delta$  112.4, 109.2, 85.0, 84.8, 81.9, 75.1, 70.9, 70.5, 58.8, 54.8, 26.4, 24.9

**HRMS (ESI):**  $m/z$  calcd for  $\text{C}_{24}\text{H}_{38}\text{NO}_{10}$  [ $\text{M}+\text{NH}_4$ ] +500.2496, found 500.2491  
 $[\alpha]_{\text{D}}^{30}$  = -56.00 (c 0.25,  $\text{CHCl}_3$ )

### 1,6-bis(((3aS,4R,6S,6aS)-6-methoxy-2,2-dimethyltetrahydrofuro[3,4-d][1,3]dioxol-4-yl)methoxy)hexa-2,4-diyne (**2b**)

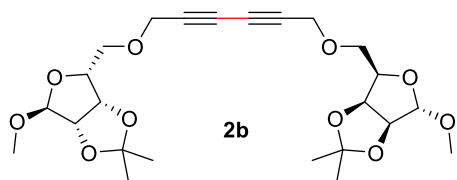

Prepared by dissolving 50 mg alkynyl glycoside (0.20 mmol) in 4 ml of DCE followed by addition of aniline (9  $\mu$ l, 0.1 mmol) and copper (I) bromide (3 mg, 0.02 mmol) at room temperature for 12 hours and purified by flash chromatography (5-10% EtOAc/Petroleum ether) on silica gel (mesh size 100-200) to obtain **2b** in 63% (31 mg) as a yellowish gummy type solid.

**$^1\text{H}$  NMR (400 MHz,  $\text{CDCl}_3$ ):**  $\delta$  4.85 (s, 2H), 4.67 (dd,  $J$  = 5.9, 3.8 Hz, 2H), 4.49 (d,  $J$  = 5.9 Hz, 2H), 4.33 – 4.20 (m, 4H), 4.12 – 4.02 (m, 2H), 3.90 – 3.78 (m, 2H), 3.72 – 3.63 (m, 2H), 3.27 (s, 6H), 1.39 (s, 6H), 1.24 (s, 6H)



**<sup>13</sup>C NMR (101 MHz, CDCl<sub>3</sub>):** δ 112.6, 107.2, 84.8, 79.8, 78.6, 75.2, 70.6, 68.3, 59.1, 54.7, 26.0, 24.8

**HRMS (ESI):** *m/z* calcd for C<sub>24</sub>H<sub>38</sub>NO<sub>10</sub> [M+NH<sub>4</sub>] +500.2496, found 500.2492

[α]<sub>D</sub><sup>30</sup> = +26.40 (c 0.25, CHCl<sub>3</sub>)

**1,6-bis(((3aR,5R,6S,6aR)-6-methoxy-2,2-dimethyltetrahydrofuro[2,3-d][1,3]dioxol-5-yl)methoxy)hexa-2,4-diyne (2c)**

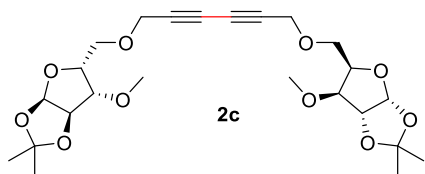

Prepared by dissolving 50 mg alkynyl glycoside (0.20 mmol) in 4 ml of DCE followed by addition of aniline (9 μl, 0.1 mmol) and copper (I) bromide (3 mg, 0.02 mmol) at room temperature for 12 hours and purified by flash chromatography (5-10% EtOAc/Petroleum ether) on silica gel (mesh size 100-200) to obtain **2c** in 62% (31 mg) as a yellowish gummy type solid.

**<sup>1</sup>H NMR (400 MHz, CDCl<sub>3</sub>):** δ 5.84 (d, *J* = 3.8 Hz, 2H), 4.50 (d, *J* = 3.8 Hz, 2H), 4.31 – 4.28 (m, 2H), 4.26 – 4.12 (m, 4H), 3.75 (dd, *J* = 10.1, 5.2 Hz, 2H), 3.68 – 3.59 (m, 4H), 3.35 (s, 6H), 1.42 (s, 6H), 1.25 (s, 6H)

**<sup>13</sup>C NMR (101 MHz, CDCl<sub>3</sub>):** δ 111.7, 105.1, 84.1, 81.5, 78.9, 75.2, 70.5, 67.6, 59.1, 58.0, 26.8, 26.3

**HRMS (ESI):** *m/z* calcd for C<sub>24</sub>H<sub>38</sub>NO<sub>10</sub> [M+NH<sub>4</sub>] +500.2496, found 500.2495

[α]<sub>D</sub><sup>30</sup> = -55.20 (c 0.25, CHCl<sub>3</sub>)

**1,6-bis(((3aR,4R,6R,6aR)-6-butoxy-2,2-dimethyltetrahydrofuro[3,4-d][1,3]dioxol-4-yl)methoxy)hexa-2,4-diyne (2d)**

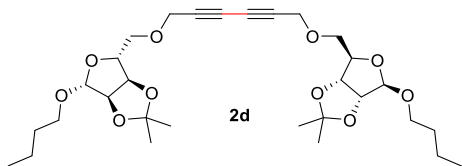

Prepared by dissolving 50 mg alkynyl glycoside (0.17 mmol) in 4 ml of DCE followed by addition of aniline (8 μl, 0.08 mmol) and copper (I) bromide (2.5 mg, 0.01 mmol) at room temperature for



12 hours and purified by flash chromatography (4-8% EtOAc/Petroleum ether) on silica gel (mesh size 100-200) to obtain **2d** in 60% (29 mg) as a yellowish gummy type solid.

**<sup>1</sup>H NMR (400 MHz, CDCl<sub>3</sub>):** δ 5.00 (s, 2H), 4.60 (dd, *J* = 6.0, 0.8 Hz, 2H), 4.53 (d, *J* = 6.0 Hz, 2H), 4.26 – 4.21 (m, 2H), 4.20 (s, 4H), 3.60 (dt, *J* = 9.6, 6.6 Hz, 2H), 3.48 (ddd, *J* = 17.3, 9.4, 7.3 Hz, 4H), 3.30 (dt, *J* = 9.6, 6.5 Hz, 2H), 1.49 – 1.44 (m, 4H), 1.42 (s, 6H), 1.34 – 1.27 (m, 4H), 1.25 (s, 6H), 0.85 (t, *J* = 7.3 Hz, 6H)

**<sup>13</sup>C NMR (101 MHz, CDCl<sub>3</sub>):** δ 112.4, 108.1, 85.2, 84.7, 82.0, 75.1, 71.0, 70.6, 67.5, 58.8, 31.5, 26.4, 24.9, 19.3, 13.8

**HRMS (ESI):** *m/z* calcd for C<sub>30</sub>H<sub>50</sub>NO<sub>10</sub> [M+NH<sub>4</sub>] +584.3435, found 584.3437

[α]<sub>D</sub><sup>30</sup> = -36.00 (c 0.25, CHCl<sub>3</sub>)

**1,6-bis(((3aR,4R,6R,6aR)-6-(allyloxy)-2,2-dimethyltetrahydrofuro[3,4-d][1,3]dioxol-4-yl)methoxy)hexa-2,4-diyne (2e)**

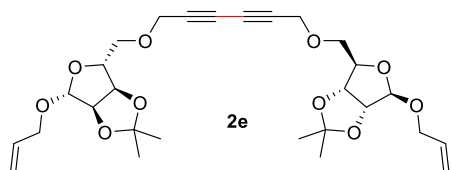

Prepared by dissolving 50 mg alkynyl glycoside (0.18 mmol) in 4 ml of DCE followed by addition of aniline (8.5 μl, 0.09 mmol) and copper (I) bromide (2.5 mg, 0.01 mmol) at room temperature for 12 hours and purified by flash chromatography (6-12% EtOAc/Petroleum ether) on silica gel (mesh size 100-200) to obtain **2e** in 61% (31 mg) as a yellowish gummy type solid.

**<sup>1</sup>H NMR (400 MHz, CDCl<sub>3</sub>):** δ 5.87 – 5.75 (m, 2H), 5.25 – 5.18 (m, 2H), 5.16 – 5.10 (m, 2H), 5.06 (s, 2H), 4.59 (dd, *J* = 15.3, 6.0 Hz, 4H), 4.26 (t, *J* = 7.2 Hz, 2H), 4.19 (s, 4H), 4.13 – 4.07 (m, 2H), 3.89 (dd, *J* = 12.9, 6.1 Hz, 2H), 3.56 – 3.43 (m, 4H), 1.42 (s, 6H), 1.25 (s, 6H)

**<sup>13</sup>C NMR (101 MHz, CDCl<sub>3</sub>):** δ 133.7, 117.4, 112.5, 107.1, 85.1, 84.9, 81.9, 75.1, 70.9, 70.6, 68.0, 58.9, 26.4, 24.9

**HRMS (ESI):** *m/z* calcd for C<sub>38</sub>H<sub>40</sub>NO<sub>5</sub> [M+H] +552.2809, found 552.2811

[α]<sub>D</sub><sup>30</sup> = -16.00 (c 0.25, CHCl<sub>3</sub>)

**1,6-bis(((3aR,4R,6R,6aR)-6-(cyclohexyloxy)-2,2-dimethyltetrahydrofuro[3,4-d][1,3]dioxol-4-yl)methoxy)hexa-2,4-diyne (2f)**



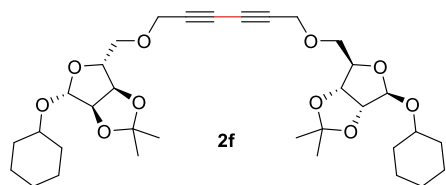

Prepared by dissolving 50 mg alkynyl glycoside (0.16 mmol) in 4 ml of DCE followed by addition of aniline (7.3  $\mu$ l, 0.08 mmol) and copper (I) bromide (2.3 mg, 0.01 mmol) at room temperature for 12 hours and purified by flash chromatography (4-8% EtOAc/Petroleum ether) on silica gel (mesh size 100-200) to obtain **2f** in 62% (31 mg) as a yellowish gummy type solid.

**<sup>1</sup>H NMR (400 MHz, CDCl<sub>3</sub>):**  $\delta$  5.17 (s, 2H), 4.61 (d,  $J$  = 6.0 Hz, 2H), 4.52 (d,  $J$  = 6.0 Hz, 2H), 4.23 (d,  $J$  = 6.7 Hz, 2H), 4.20 (s, 2H), 3.61 – 3.43 (m, 8H), 1.87 – 1.59 (m, 12H), 1.42 (s, 6H), 1.25 (s, 6H), 1.18 (t,  $J$  = 8.8 Hz, 8H)

**<sup>13</sup>C NMR (101 MHz, CDCl<sub>3</sub>):**  $\delta$  112.3, 105.6, 85.5, 84.7, 82.2, 75.1, 74.6, 71.1, 70.6, 58.8, 33.3, 31.0, 26.4, 25.6, 24.9, 24.1, 23.8

**HRMS (ESI):**  $m/z$  calcd for C<sub>34</sub>H<sub>54</sub>NO<sub>10</sub> [M+NH<sub>4</sub>] +636.3748, found 636.3749

$[\alpha]_D^{30}$  = -37.60 (c 0.25, CHCl<sub>3</sub>)

**1,6-bis(((3aS,4S,6R,6aS)-6-((R)-2,2-dimethyl-1,3-dioxolan-4-yl)-2,2-dimethyltetrahydrofuro[3,4-d][1,3]dioxol-4-yl)oxy)hexa-2,4-diyne (2g)**

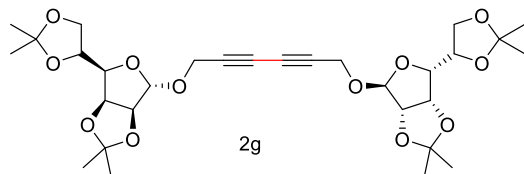

Prepared by dissolving 50 mg alkynyl glycoside (0.16 mmol) in 4 ml of DCE followed by addition of aniline (7.3  $\mu$ l, 0.08 mmol) and copper (I) bromide (2.3 mg, 0.01 mmol) at room temperature for 12 hours and purified by flash chromatography (5-10% EtOAc/Petroleum ether) on silica gel (mesh size 100-200) to obtain **2g** in 58% (29 mg) as a yellowish gummy type solid.

**<sup>1</sup>H NMR (400 MHz, CDCl<sub>3</sub>):**  $\delta$  5.09 (d,  $J$  = 1.8 Hz, 2H), 4.72 (dd,  $J$  = 3.6, 2.1 Hz, 2H), 4.58 – 4.52 (m, 2H), 4.37 – 4.31 (m, 2H), 4.21 – 4.17 (m, 4H), 4.05 (ddd,  $J$  = 6.9, 4.1, 2.0 Hz, 2H), 4.00 – 3.94 (m, 2H), 3.90 – 3.84 (m, 2H), 1.40 (s, 6H), 1.39 – 1.38 (m, 6H), 1.31 (s, 6H), 1.26 (s, 6H)

**<sup>13</sup>C NMR (101 MHz, CDCl<sub>3</sub>):**  $\delta$  112.7, 109.2, 104.9, 84.9, 80.7, 79.4, 74.6, 73.0, 70.3, 66.8, 54.4, 26.9, 25.9, 25.2, 24.5

**HRMS (ESI):**  $m/z$  calcd for C<sub>30</sub>H<sub>46</sub>NO<sub>12</sub> [M+NH<sub>4</sub>] +612.3020, found 612.3023



$[\alpha]_D^{30} = +36.30$  (c 0.25,  $\text{CHCl}_3$ )

**1,6-bis(((3aR,5R,6S,6aR)-5-((R)-2,2-dimethyl-1,3-dioxolan-4-yl)-2,2-dimethyltetrahydrofuro[2,3-d][1,3]dioxol-6-yl)oxy)hexa-2,4-diyne (2h)**

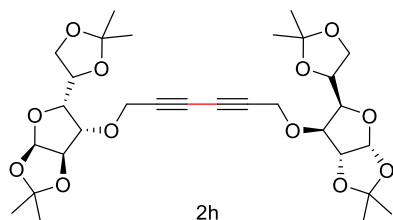

Prepared by dissolving 50 mg alkynyl glycoside (0.16 mmol) in 4 ml of DCE followed by addition of aniline (7.3  $\mu\text{l}$ , 0.08 mmol) and copper (I) bromide (2.3 mg, 0.01 mmol) at room temperature for 12 hours and purified by flash chromatography (5-10% EtOAc/Petroleum ether) on silica gel (mesh size 100-200) to obtain **2h** in 60% (30 mg) as a yellowish gummy type solid

**$^1\text{H}$  NMR (400 MHz,  $\text{CDCl}_3$ ):**  $\delta$  5.88 (d,  $J = 3.7$  Hz, 2H), 4.60 (d,  $J = 3.6$  Hz, 2H), 4.38 (s, 4H), 4.28 – 4.21 (m, 2H), 4.10 (ddd,  $J = 5.4, 4.7, 4.1$  Hz, 4H), 4.10 – 4.07 (m, 2H), 3.99 (dd,  $J = 8.6, 5.3$  Hz, 2H), 1.50 (s, 6H), 1.43 (s, 6H), 1.36 (s, 6H), 1.32 (s, 6H)

**$^{13}\text{C}$  NMR (101 MHz,  $\text{CDCl}_3$ ):**  $\delta$  111.9, 109.1, 105.2, 82.8, 81.7, 81.0, 75.1, 72.4, 70.5, 67.3, 58.6, 26.8, 26.8, 26.2, 25.3

**HRMS (ESI):**  $m/z$  calcd for  $\text{C}_{30}\text{H}_{46}\text{NO}_{12}$   $[\text{M}+\text{NH}_4]^+$  +612.3020, found 612.3023

$[\alpha]_D^{30} = -44.20$  (c 0.25,  $\text{CHCl}_3$ )

**3aR,3a'R,4R,4'R,6R,6aR,6'R,6a'R)-6,6'-((hexa-2,4-diyne-1,6-diylbis(oxy))bis(methylene))bis(2,2-dimethyltetrahydrofuro[3,4-d][1,3]dioxol-4-ol) (2i)**

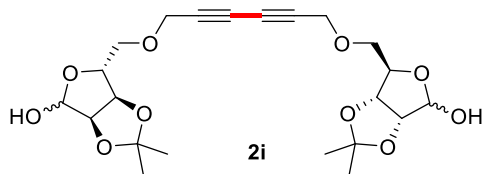

Prepared by dissolving 50 mg of alkynyl riboside (0.21 mmol) in 4 ml of DCE followed by addition of aniline (9.4  $\mu\text{l}$ , 0.10 mmol) and copper (I) bromide (3 mg, 0.02 mmol) at room temperature for 12 hours and purified by flash chromatography (30-45% EtOAc/Petroleum ether) on silica gel (mesh size 100-200) to obtain **2i** in 56% (28 mg) as a yellow gummy type solid.



**<sup>1</sup>H NMR (400 MHz, CDCl<sub>3</sub>):** δ 5.23 (d, *J* = 2.3 Hz, 2H), 4.82 (dd, *J* = 10.6, 3.9 Hz, 2H), 4.64 (dd, *J* = 5.3, 2.6 Hz, 2H), 4.41 (d, *J* = 3.0 Hz, 2H), 4.36 (d, *J* = 2.2 Hz, 4H), 3.67 (d, *J* = 14.5 Hz, 4H), 1.49 (s, 6H), 1.33 (s, 6H)

**<sup>13</sup>C NMR (101 MHz, CDCl<sub>3</sub>):** δ 112.3, 107.6, 88.4, 85.6, 81.3, 74.4, 70.6, 63.7, 55.4, 26.3, 24.7

**HRMS (ESI):** *m/z* calcd for C<sub>22</sub>H<sub>34</sub>NO<sub>10</sub> [M+NH<sub>4</sub>] +472.2183, found 472.2187

[α]<sub>D</sub><sup>30</sup> = -119.20 (c 0.25, CHCl<sub>3</sub>)

**1,6-bis(((3aR,5R,5aR,8aR,8bR)-2,2,7,7-tetramethyltetrahydro-5H-bis([1,3]dioxolo)[4,5-b:4',5'-d]pyran-5-yl)methoxy)hexa-2,4-diyne (2j)**

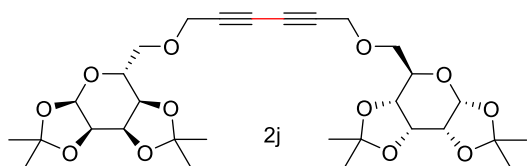

Prepared by dissolving 50 mg alkynyl glycoside (0.16 mmol) in 4 ml of DCE followed by addition of aniline (7.3 μl, 0.08 mmol) and copper (I) bromide (2.3 mg, 0.01 mmol) at room temperature for 12 hours and purified by flash chromatography (4-10% EtOAc/Petroleum ether) on silica gel (mesh size 100-200) to obtain **2j** in 62% (31 mg) as a yellowish gummy type solid

**<sup>1</sup>H NMR (400 MHz, CDCl<sub>3</sub>):** δ 5.47 (d, *J* = 5.0 Hz, 2H), 4.54 (dd, *J* = 7.9, 2.4 Hz, 2H), 4.29 – 4.24 (m, 4H), 4.20 (d, *J* = 1.5 Hz, 2H), 4.17 (dd, *J* = 5.6, 3.6 Hz, 2H), 3.92 (ddd, *J* = 7.0, 5.0, 1.7 Hz, 2H), 3.70 (dd, *J* = 10.1, 5.0 Hz, 2H), 3.61 – 3.55 (m, 2H), 1.48 (s, 6H), 1.39 (s, 6H), 1.28 (s, 6H), 1.26 (s, H)

**<sup>13</sup>C NMR (101 MHz, CDCl<sub>3</sub>):** δ 109.4, 108.6, 96.3, 77.2, 75.3, 71.1, 70.6, 70.4, 69.0, 66.8, 59.0, 26.0, 25.9, 24.9, 24.4

**HRMS (ESI):** *m/z* calcd for C<sub>30</sub>H<sub>46</sub>NO<sub>12</sub> [M+NH<sub>4</sub>] +612.3020, found 612.3025

[α]<sub>D</sub><sup>30</sup> = -45.50 (c 0.25, CHCl<sub>3</sub>)

**1,6-bis(((3a'R,5'R,5a'R,8a'R,8b'R)-tetrahydro-5'H-dispiro[cyclohexane-1,2'-bis([1,3]dioxolo)[4,5-b:4',5'-d]pyran-7',1'-cyclohexan]-5'-yl)methoxy)hexa-2,4-diyne (2k)**

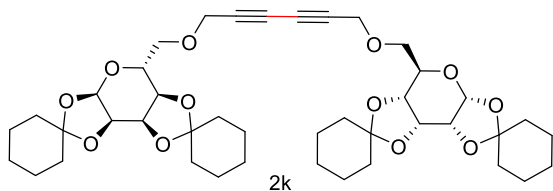



Prepared by dissolving 50 mg alkynyl glycoside (0.13 mmol) in 4 ml of DCE followed by addition of aniline (7.3  $\mu$ l, 0.08 mmol) and copper (I) bromide (2.3 mg, 0.02 mmol) at room temperature for 12 hours and purified by flash chromatography (5-8% EtOAc/Petroleum ether) on silica gel (mesh size 100-200) to obtain **2k** in 58% (29 mg) as a yellowish gummy type solid

**$^1\text{H}$  NMR (400 MHz,  $\text{CDCl}_3$ ):**  $\delta$  5.47 (d,  $J$  = 5.0 Hz, 2H), 4.55 (dd,  $J$  = 7.9, 2.4 Hz, 2H), 4.31 – 4.24 (m, 4H), 4.22 – 4.15 (m, 4H), 3.91 (ddd,  $J$  = 7.0, 5.1, 1.7 Hz, 2H), 3.76 – 3.69 (m, 2H), 3.58 (dd,  $J$  = 9.9, 7.0 Hz, 2H), 1.69 (dd,  $J$  = 8.8, 4.7 Hz, 4H), 1.60 (d,  $J$  = 6.2 Hz, 4H), 1.56 – 1.51 (m, 8H), 1.51 – 1.41 (m, 16H), 1.33 (s, 8H)

**$^{13}\text{C}$  NMR (101 MHz,  $\text{CDCl}_3$ ):**  $\delta$  109.9, 109.2, 95.9, 75.3, 70.7, 70.5, 70.3, 70.0, 69.0, 66.8, 58.9, 35.6, 34.2, 34.0, 25.1, 25.0, 23.9, 23.8, 23.7, 23.5

**HRMS (ESI):**  $m/z$  calcd for  $\text{C}_{42}\text{H}_{62}\text{NO}_{12}$  [ $\text{M}+\text{NH}_4$ ] +772.4272, found 772.4276

$[\alpha]_{\text{D}}^{30}$  = -48.70 (c 0.25,  $\text{CHCl}_3$ )

**1,4-bis((3aR,4R,6R,6aR)-6-methoxy-2,2-dimethyltetrahydrofuro[3,4-d][1,3]dioxol-4-yl)buta-1,3-diyne (3a)**

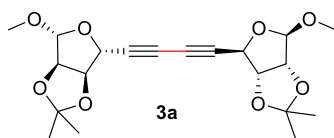

Prepared by dissolving 50 mg alkynyl glycoside (0.25 mmol) in 4 ml of DCE followed by addition of aniline (12  $\mu$ l, 0.12 mmol) and copper (I) bromide (3.5 mg, 0.02 mmol) at room temperature for 12 hours and purified by flash chromatography (5-10% EtOAc/Petroleum ether) on silica gel (mesh size 100-200) to obtain **3a** in 66% (32 mg) as a whitish solid.

**$^1\text{H}$  NMR (400 MHz,  $\text{CDCl}_3$ ):**  $\delta$  4.97 (s, 2H), 4.81 (d,  $J$  = 5.8 Hz, 2H), 4.77 (s, 2H), 4.60 (d,  $J$  = 5.8 Hz, 2H), 3.32 (s, 6H), 1.38 (s, 6H), 1.23 (s, 6H)

**$^{13}\text{C}$  NMR (101 MHz,  $\text{CDCl}_3$ ):**  $\delta$  112.9, 109.2, 85.1, 85.0, 77.3, 75.1, 69.7, 54.5, 26.2, 24.9

**HRMS (ESI):**  $m/z$  calcd for  $\text{C}_{20}\text{H}_{30}\text{NO}_8$  [ $\text{M}+\text{NH}_4$ ] +412.1971, found 412.1973

$[\alpha]_{\text{D}}^{30}$  = -84.00 (c 0.25,  $\text{CHCl}_3$ )

**1,4-bis((3aS,4R,6S,6aS)-6-methoxy-2,2-dimethyltetrahydrofuro[3,4-d][1,3]dioxol-4-yl)buta-1,3-diyne (3b)**



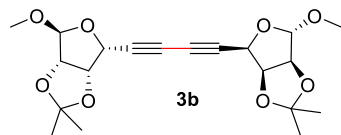

Prepared by dissolving 50 mg alkynyl glycoside (0.25 mmol) in 4 ml of DCE followed by addition of aniline (12  $\mu$ l, 0.12 mmol) and copper (I) bromide (3.5 mg, 0.02 mmol) at room temperature for 12 hours and purified by flash chromatography (5-10% EtOAc/Petroleum ether) on silica gel (mesh size 100-200) to obtain **3b** in 64% (31 mg) as a pale brown gummy type solid.

**$^1\text{H}$  NMR (400 MHz,  $\text{CDCl}_3$ ):**  $\delta$  4.86 (s, 2H), 4.68 (d,  $J$  = 4.0 Hz, 2H), 4.62 (d,  $J$  = 2.7 Hz, 2H), 4.49 (dd,  $J$  = 10.4, 6.0 Hz, 2H), 3.27 (s, 6H), 1.45 (s, 6H), 1.27 (s, 6H)

**$^{13}\text{C}$  NMR (101 MHz,  $\text{CDCl}_3$ ):**  $\delta$  113.5, 107.1, 84.6, 80.7, 73.0, 72.2, 71.3, 54.9, 26.3, 25.3

**HRMS (ESI):**  $m/z$  calcd for  $\text{C}_{20}\text{H}_{30}\text{NO}_8$  [ $\text{M}+\text{NH}_4$ ] +412.1971, found 412.1970

$[\alpha]_{\text{D}}^{30}$  = -44.00 (c 0.25,  $\text{CHCl}_3$ )

**1,4-bis((3aR,5R,6S,6aR)-6-methoxy-2,2-dimethyltetrahydrofuro[2,3-d][1,3]dioxol-5-yl)buta-1,3-diyne (3c)**

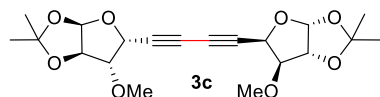

Prepared by dissolving 50 mg alkynyl glycoside (0.25 mmol) in 4 ml of DCE followed by addition of aniline (12  $\mu$ l, 0.12 mmol) and copper (I) bromide (3.5 mg, 0.02 mmol) at room temperature for 12 hours and purified by flash chromatography (5-10% EtOAc/Petroleum ether) on silica gel (mesh size 100-200) to obtain **3c** in 62% (31 mg) as a dark brown gummy type solid.

**$^1\text{H}$  NMR (400 MHz,  $\text{CDCl}_3$ ):**  $\delta$  5.85 (d,  $J$  = 3.7 Hz, 2H), 4.80 (d,  $J$  = 2.9 Hz, 2H), 4.50 (d,  $J$  = 3.7 Hz, 2H), 3.73 (d,  $J$  = 3.0 Hz, 2H), 3.46 (s, 6H), 1.41 (s, 6H), 1.24 (s, 6H)

**$^{13}\text{C}$  NMR (101 MHz,  $\text{CDCl}_3$ ):**  $\delta$  112.1, 104.7, 85.3, 82.1, 73.1, 71.8, 71.1, 58.9, 26.8, 26.1

**HRMS (ESI):**  $m/z$  calcd for  $\text{C}_{20}\text{H}_{30}\text{NO}_8$  [ $\text{M}+\text{NH}_4$ ] +412.1971 found 412.1967

$[\alpha]_{\text{D}}^{30}$  = -17.60 (c 0.25,  $\text{CHCl}_3$ )

**(3aR,3a'R,5R,5'R,6S,6aR,6'S,6a'R)-buta-1,3-diyne-1,4-diylbis(2,2-dimethyltetrahydrofuro[2,3-d][1,3]dioxole-5,6-diyl) diacetate (3d)**

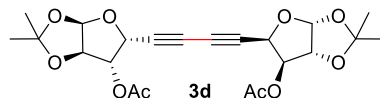



Prepared by dissolving 50 mg alkynyl glycoside (0.22 mmol) in 4 ml of DCE followed by addition of aniline (10  $\mu$ l, 0.11 mmol) and copper (I) bromide (3 mg, 0.02 mmol) at room temperature for 12 hours and purified by flash chromatography (10-12% EtOAc/Petroleum ether) on silica gel (mesh size 100-200) to obtain **3d** in 55% (27 mg) as a brown gummy type solid.

**<sup>1</sup>H NMR (400 MHz, CDCl<sub>3</sub>):**  $\delta$  5.89 (d,  $J$  = 3.7 Hz, 2H), 5.28 (d,  $J$  = 3.0 Hz, 2H), 4.91 (d,  $J$  = 3.0 Hz, 2H), 4.49 (d,  $J$  = 3.7 Hz, 2H), 2.08 (s, 6H), 1.43 (s, 6H), 1.24 (s, 6H)

**<sup>13</sup>C NMR (101 MHz, CDCl<sub>3</sub>):**  $\delta$  169.3, 112.6, 104.7, 82.9, 76.7, 72.3, 71.6, 70.6, 26.7, 26.1, 20.6

**HRMS (ESI):**  $m/z$  calcd for C<sub>22</sub>H<sub>30</sub>NO<sub>10</sub> [M+NH<sub>4</sub>] +468.1870, found 468.1865

$[\alpha]_D^{30}$  = +21.60 (c 0.25, CHCl<sub>3</sub>)

**1,4-bis((3aR,5R,6S,6aR)-6-butoxy-2,2-dimethyltetrahydrofuro[2,3-d][1,3]dioxol-5-yl)buta-1,3-diyne (3e)**

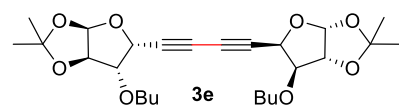

Prepared by dissolving 50 mg alkynyl glycoside (0.20 mmol) in 4 ml of DCE followed by addition of aniline (9.4  $\mu$ l, 0.10 mmol) and copper (I) bromide (3 mg, 0.02 mmol) at room temperature for 12 hours and purified by flash chromatography (8-10% EtOAc/Petroleum ether) on silica gel (mesh size 100-200) to obtain **3e** in 62% (30 mg) as a yellowish gummy type solid.

**<sup>1</sup>H NMR (400 MHz, CDCl<sub>3</sub>):**  $\delta$  5.93 – 5.79 (d, 2H), 4.79 (dd,  $J$  = 6.6, 2.9 Hz, 2H), 4.54 – 4.40 (m, 2H), 3.81 (d,  $J$  = 2.8 Hz, 2H), 3.65 – 3.47 (m, 4H), 1.50 (dd,  $J$  = 17.3, 7.1 Hz, 8H), 1.40 (s, 6H), 1.23 (s, 6H), 0.89 – 0.83 (m, 6H)

**<sup>13</sup>C NMR (101 MHz, CDCl<sub>3</sub>):**  $\delta$  112.0, 104.8, 83.8, 82.9, 73.1, 71.7, 71.3, 71.3, 31.6, 26.8, 26.1, 19.1, 13.8

**HRMS (ESI):**  $m/z$  calcd for C<sub>26</sub>H<sub>42</sub>NO<sub>8</sub> [M+NH<sub>4</sub>] +496.2910, found 496.2908

$[\alpha]_D^{30}$  = -10.40 (c 0.25, CHCl<sub>3</sub>)

**1,4-bis((3aR,5R,6S,6aR)-6-(benzyloxy)-2,2-dimethyltetrahydrofuro[2,3-d][1,3]dioxol-5-yl)buta-1,3-diyne (3f)**

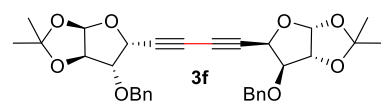



Prepared by dissolving 50 mg alkynyl glycoside (0.18 mmol) in 4 ml of DCE followed by addition of aniline (8.2  $\mu$ l, 0.09 mmol) and copper (I) bromide (2.5 mg, 0.01 mmol) at room temperature for 12 hours and purified by flash chromatography (7-10% EtOAc/Petroleum ether) on silica gel (mesh size 100-200) to obtain **3f** in 66% (32 mg) as a yellowish gummy type solid.

**$^1\text{H}$  NMR (400 MHz,  $\text{CDCl}_3$ ):**  $\delta$  7.31 – 7.20 (m, 10H), 5.90 (d,  $J$  = 3.7 Hz, 2H), 4.84 (d,  $J$  = 2.8 Hz, 2H), 4.66 (q,  $J$  = 12.1 Hz, 4H), 4.50 (d,  $J$  = 3.7 Hz, 2H), 3.95 (t,  $J$  = 9.8 Hz, 2H), 1.39 (s, 6H), 1.22 (s, 6H)

**$^{13}\text{C}$  NMR (101 MHz,  $\text{CDCl}_3$ ):**  $\delta$  137.0, 128.5, 128.0, 127.9, 112.1, 104.8, 82.9, 82.6, 73.5, 72.8, 72.0, 71.3, 26.8, 26.1

**HRMS (ESI):**  $m/z$  calcd for  $\text{C}_{32}\text{H}_{38}\text{NO}_8$  [ $\text{M}+\text{NH}_4$ ] +564.2597, found 564.2598

$[\alpha]_{\text{D}}^{30} = -41.60$  (c 0.25,  $\text{CHCl}_3$ )

**(3aR,5R,6S,6aR)-5-(((3aR,4R,6R,6aR)-6-methoxy-2,2-dimethyltetrahydrofuro[3,4-d][1,3]dioxol-4-yl)buta-1,3-diyne-1-yl)-2,2-dimethyltetrahydrofuro[2,3-d][1,3]dioxol-6-yl acetate (4a)**

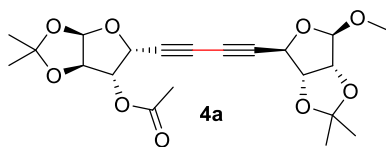

Prepared by dissolving 50 mg of alkynyl riboside (0.25 mmol) and alkynyl xyloside (0.22 mmol) in 6 ml of DCE followed by addition of aniline (9.4  $\mu$ l, 0.10 mmol) and copper (I) bromide (3 mg, 0.02 mmol) at room temperature for 12 hours and purified by flash chromatography (8-15% EtOAc/Petroleum ether) on silica gel (mesh size 100-200) to obtain **4a** in 15% (12 mg) as a darkish solid.

**$^1\text{H}$  NMR (400 MHz,  $\text{CDCl}_3$ )**  $\delta$  5.89 (d,  $J$  = 3.7 Hz, 1H), 5.27 (d,  $J$  = 3.1 Hz, 1H), 4.96 (s, 1H), 4.91 (d,  $J$  = 3.1 Hz, 1H), 4.81 (d,  $J$  = 5.8 Hz, 1H), 4.76 (s, 1H), 4.59 (d,  $J$  = 5.8 Hz, 1H), 4.50 (d,  $J$  = 3.7 Hz, 1H), 3.30 (s, 3H), 2.08 (s, 3H), 1.43 (s, 3H), 1.38 (s, 3H), 1.24 (s, 3H), 1.23 (s, 3H)

**$^{13}\text{C}$  NMR (101 MHz,  $\text{CDCl}_3$ )**  $\delta$  169.4, 112.9, 112.6, 109.2, 104.7, 85.0, 85.0, 82.9, 77.4, 76.7, 75.0, 72.2, 72.0, 70.6, 69.4, 54.5, 26.7, 26.2, 26.1, 24.9, 20.6

**HRMS (ESI):**  $m/z$  calcd for  $\text{C}_{21}\text{H}_{30}\text{NO}_9$  [ $\text{M}+\text{NH}_4$ ] +440.1921, found 440.1919

$[\alpha]_{\text{D}}^{30} = -15.20$  (c 0.25,  $\text{CHCl}_3$ )



**3-benzyl-1-((2R,3R,4R,5R)-3,4-bis(benzyloxy)-5-((trityloxy)methyl)tetrahydrofuran-2-yl)pyrimidine-2,4(1H,3H)-dione (5a)**

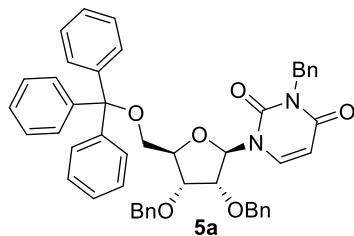

Prepared by dissolving 150 mg uridine (0.61 mmol) in 10 ml of dry pyridine followed by portion wise addition of 257 mg trityl chloride (0.92 mmol) under inert condition at room temperature for 12 hours and purified by flash chromatography (2-5% DCM/Methanol) on silica gel (mesh size 60-100) to obtain C5 tritylated uridine in 90% (272 mg) as a white powder which was dissolved in dry DMF followed by addition of sodium hydride and benzyl bromide at 0°C. The reaction mixture was stirred at room temperature for 2 hours. After completion of reaction as judged by TLC the reaction mixture was extracted with ethyl acetate and water. The combined organic layer was collected, reduced under high vacuum and purified by flash chromatography (7-10% EtOAc/Petroleum ether) using silica gel (mesh size 60-100) to obtain **5a** in 80% (338 mg) as a white crystalline powder.

**<sup>1</sup>H NMR (400 MHz, CDCl<sub>3</sub>):** δ 8.06 (d, *J* = 8.1 Hz, 1H), 7.60 – 7.54 (m, 2H), 7.45 – 7.42 (m, 2H), 7.40 (dd, *J* = 5.3, 3.4 Hz, 2H), 7.36 (dd, *J* = 4.3, 2.7 Hz, 2H), 7.34 – 7.29 (m, 20H), 7.21 – 7.16 (m, 2H), 6.09 (s, 1H), 5.26 – 5.15 (m, 3H), 4.92 (q, *J* = 12.3 Hz, 2H), 4.44 (d, *J* = 11.7 Hz, 1H), 4.35 (d, *J* = 8.9 Hz, 1H), 4.29 – 4.21 (m, 2H), 3.96 (d, *J* = 4.7 Hz, 1H), 3.58 (ddd, *J* = 27.2, 11.3, 1.9 Hz, 2H)

**<sup>13</sup>C NMR (101 MHz, CDCl<sub>3</sub>):** δ 162.6, 150.7, 143.0, 137.8, 137.1, 137.0, 136.8, 129.3, 129.0, 128.7, 128.5, 128.5, 128.1, 128.0, 128.0, 127.9, 127.8, 127.7, 127.4, 101.5, 89.0, 87.4, 81.0, 78.1, 73.7, 72.0, 71.1, 60.6, 44.0

**HRMS (ESI):** *m/z* calcd for C<sub>49</sub>H<sub>45</sub>N<sub>2</sub>O<sub>6</sub> [M+H] +757.3278, found 757.3270

**3-benzyl-1-((2R,3R,4R,5R)-3,4-bis(benzyloxy)-5-(hydroxymethyl)tetrahydrofuran-2-yl)pyrimidine-2,4(1H,3H)-dione (5b)**



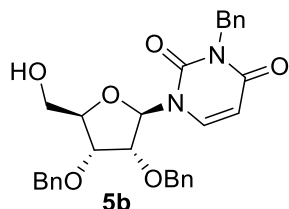

Prepared by dissolving 300 mg (0.39 mmol) of 5a in DCM followed by addition of TFA (121  $\mu$ l, 1.58 mmol) and H<sub>2</sub>O (10  $\mu$ l, 0.39 mmol) at room temperature for 2 hours and purified by flash chromatography (10-20% EtOAc/Petroleum ether) on silica gel (mesh size 60-100) to obtain **5b** in 95% (194 mg) as white solid.

**<sup>1</sup>H NMR (400 MHz, CDCl<sub>3</sub>):**  $\delta$  7.45 – 7.42 (m, 2H), 7.40 (d,  $J$  = 1.4 Hz, 1H), 7.28 – 7.20 (m, 12H), 7.17 (t,  $J$  = 2.0 Hz, 1H), 5.68 (d,  $J$  = 3.7 Hz, 1H), 5.63 (d,  $J$  = 8.1 Hz, 1H), 4.99 (q,  $J$  = 13.7 Hz, 2H), 4.70 (d,  $J$  = 12.2 Hz, 1H), 4.59 (d,  $J$  = 12.2 Hz, 1H), 4.50 (d,  $J$  = 11.7 Hz, 1H), 4.35 (d,  $J$  = 11.7 Hz, 1H), 4.21 – 4.15 (m, 2H), 4.03 – 3.96 (m, 1H), 3.90 (dd,  $J$  = 12.4, 2.1 Hz, 1H), 3.64 (dd,  $J$  = 12.4, 2.1 Hz, 1H)

**<sup>13</sup>C NMR (101 MHz, CDCl<sub>3</sub>):**  $\delta$  162.7, 150.7, 139.3, 137.4, 137.2, 136.5, 129.2, 128.5, 128.5, 128.4, 128.1, 128.0, 127.8, 127.7, 101.6, 91.4, 83.0, 78.2, 74.5, 72.3, 71.9, 60.9, 44.1

**HRMS (ESI):**  $m/z$  calcd for C<sub>30</sub>H<sub>31</sub>N<sub>2</sub>O<sub>6</sub> [M+H] +515.2182, found 515.2178

**3-benzyl-1-((2R,3R,4R,5R)-3,4-bis(benzyloxy)-5-((prop-2-yn-1-yloxy)methyl)tetrahydrofuran-2-yl)pyrimidine-2,4-dione (5c)**

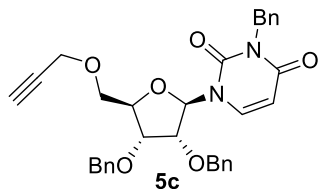

Prepared by dissolving 180 mg (0.35 mmol) of 5b in DMF followed by addition of sodium hydride 168 mg (0.70 mmol) and propargyl bromide 121  $\mu$ l (0.525 mmol) at 0°C for 2 hours. After completion of reaction as judged by TLC the reaction mixture was extracted with ethyl acetate and water. The combined organic layer was collected, reduced under high vacuum and purified by flash chromatography (7-15% EtOAc/Petroleum ether) using silica gel (mesh size 60-100) to obtain **5c** in 80% (155 mg) as a yellowish gummy type solid.

**<sup>1</sup>H NMR (400 MHz, CDCl<sub>3</sub>)**  $\delta$  7.75 (d,  $J$  = 8.2 Hz, 1H), 7.46 – 7.42 (m, 2H), 7.30 – 7.20 (m, 12H), 7.16 (s, 1H), 5.98 (d,  $J$  = 1.8 Hz, 1H), 5.61 (d,  $J$  = 8.2 Hz, 1H), 5.06 (s, 2H), 4.74 (d,  $J$  = 2.0



Hz, 2H), 4.41 – 4.37 (m, 1H), 4.28 – 4.23 (m, 2H), 4.06 (d,  $J = 2.3$  Hz, 2H), 3.90 (dd,  $J = 7.7$ , 4.8 Hz, 1H), 3.86 – 3.79 (m, 2H), 3.62 (dd,  $J = 11.0$ , 2.0 Hz, 1H), 2.38 (t,  $J = 2.3$  Hz, 1H)

**$^{13}\text{C}$  NMR (101 MHz,  $\text{CDCl}_3$ ):**  $\delta$  162.7, 150.8, 137.8, 137.3, 137.2, 136.8, 129.1, 128.7, 128.4, 128.0, 127.9, 127.7, 127.6, 101.4, 89.0, 81.0, 78.8, 78.6, 77.2, 75.1, 74.2, 72.2, 71.4, 67.4, 58.5, 44.0

**HRMS (ESI):**  $m/z$  calcd for  $\text{C}_{33}\text{H}_{33}\text{N}_2\text{O}_6$   $[\text{M}+\text{H}]^+ 553.2339$ , found 553.2334

**1,1'-((2R,2'R,3R,3'R,4R,4'R,5R,5'R)-((hexa-2,4-diyne-1,6-diylbis(oxy))bis(methylene))bis(3,4-bis(benzyloxy)tetrahydrofuran-5,2-diyl))bis(3-benzylpyrimidine-2,4(1H,3H)-dione) (5d)**

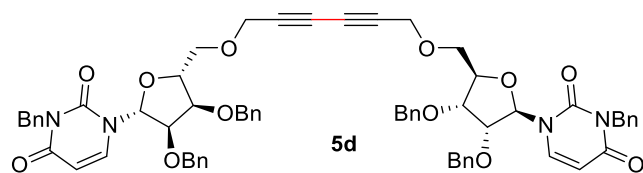

Prepared by dissolving 100 mg **5c** (0.19 mmol) in 6 ml of DCE followed by addition of aniline (9  $\mu\text{l}$ , 0.09 mmol) and copper (I) bromide (2.7 mg, 0.01 mmol) at room temperature for 12 hours and purified by flash chromatography (15-30% EtOAc/Petroleum ether) on silica gel (mesh size 100-200) to obtain **5d** in 65% (130 mg) as a yellowish gummy type solid.

**$^1\text{H}$  NMR (400 MHz,  $\text{CDCl}_3$ ):**  $^1\text{H}$  NMR (400 MHz,  $\text{CDCl}_3$ )  $\delta$  7.73 (d,  $J = 8.2$  Hz, 2H), 7.43 – 7.38 (m, 4H), 7.31 – 7.27 (m, 4H), 7.25 – 7.18 (m, 20H), 7.15 (s, 2H), 5.95 (d,  $J = 1.4$  Hz, 2H), 5.59 (d,  $J = 8.1$  Hz, 2H), 5.01 (d,  $J = 2.4$  Hz, 4H), 4.75 (d,  $J = 6.7$  Hz, 4H), 4.36 (t,  $J = 8.4$  Hz, 2H), 4.23 (dd,  $J = 6.9$ , 4.9 Hz, 4H), 4.08 (d,  $J = 5.4$  Hz, 4H), 3.93 – 3.85 (m, 4H), 3.80 (dd,  $J = 10.9$ , 1.9 Hz, 2H), 3.57 (dd,  $J = 10.9$ , 2.0 Hz, 2H)

**$^{13}\text{C}$  NMR (101 MHz,  $\text{CDCl}_3$ ):**  $\delta$  162.6, 150.7, 137.7, 137.4, 137.2, 136.8, 129.1, 128.6, 128.4, 128.4, 128.4, 128.0, 127.9, 127.8, 127.6, 101.4, 89.2, 80.8, 78.5, 75.0, 74.1, 72.2, 71.4, 70.5, 67.7, 59.0, 43.9

**HRMS (ESI):**  $m/z$  calcd for  $\text{C}_{66}\text{H}_{63}\text{N}_4\text{O}_{12}$   $[\text{M}+\text{H}]^+ 1103.4442$ , found 1103.4438

$[\alpha]_{\text{D}}^{30} = +86.40$  (c 0.25,  $\text{CHCl}_3$ )



### 3.0 NMR spectra for compounds

#### <sup>1</sup>H NMR (400 MHz, CDCl<sub>3</sub>) of 2a

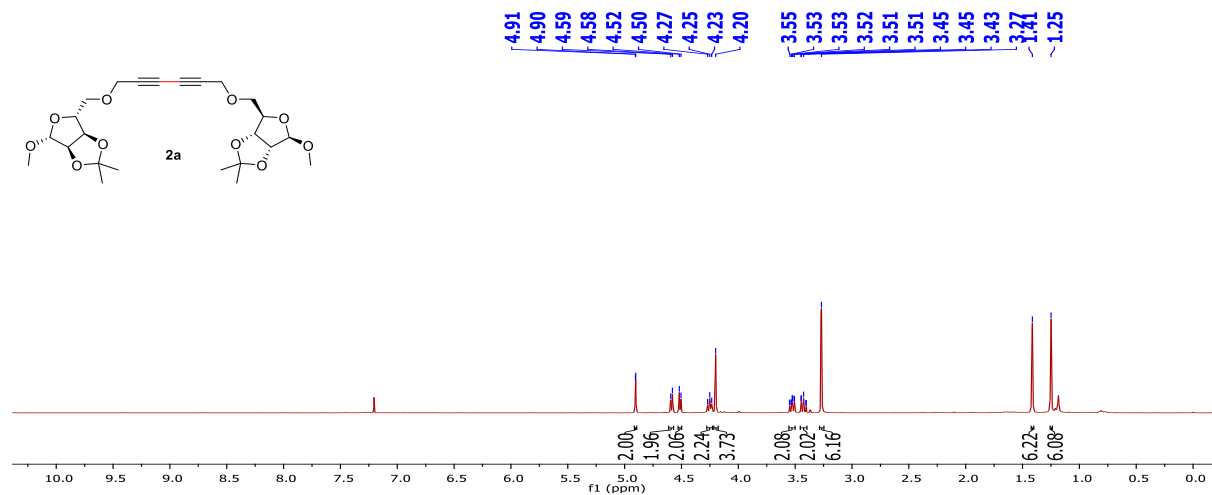

#### <sup>13</sup>C NMR (400 MHz, CDCl<sub>3</sub>) of 2a

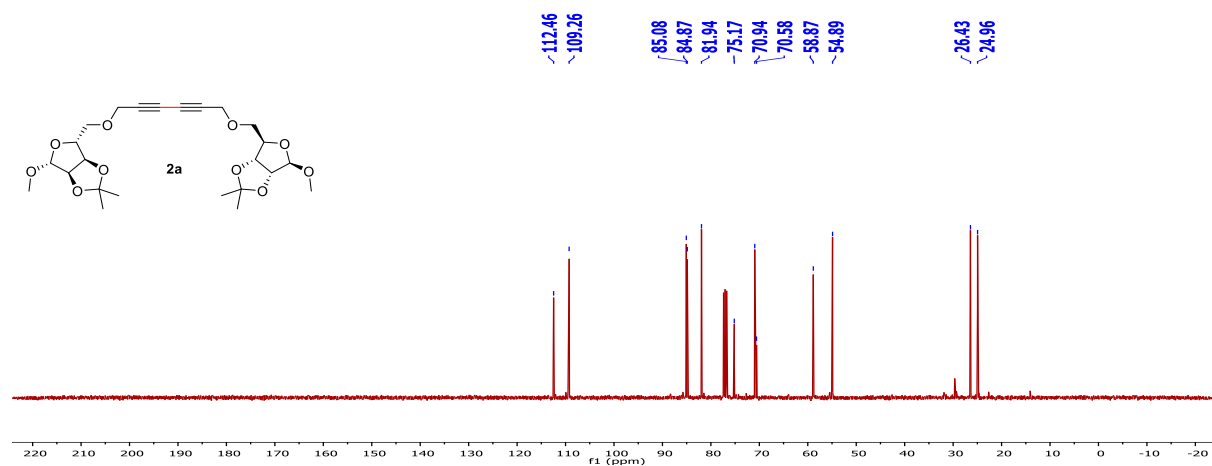

#### DEPT 135 (101 MHz, CDCl<sub>3</sub>) of 2a

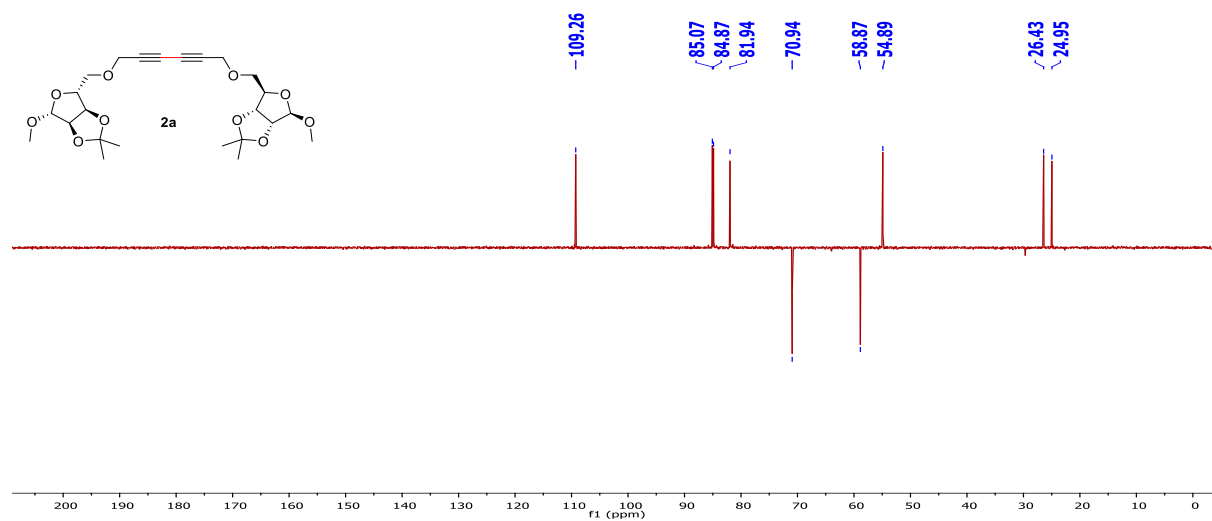



**$^1\text{H}$  NMR (400 MHz,  $\text{CDCl}_3$ ) of 2b**

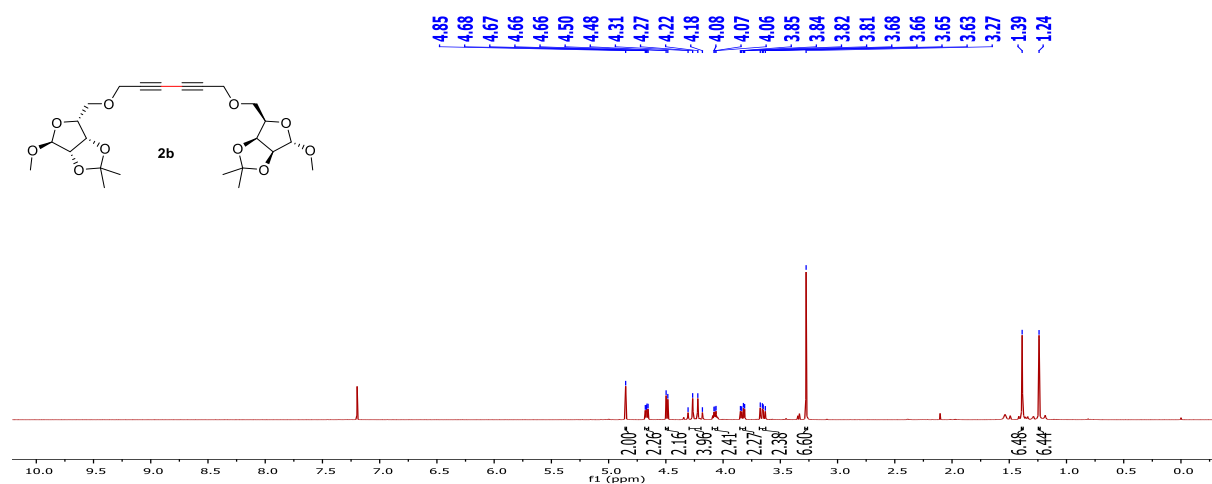

**$^{13}\text{C}$  NMR (400 MHz,  $\text{CDCl}_3$ ) of 2b**

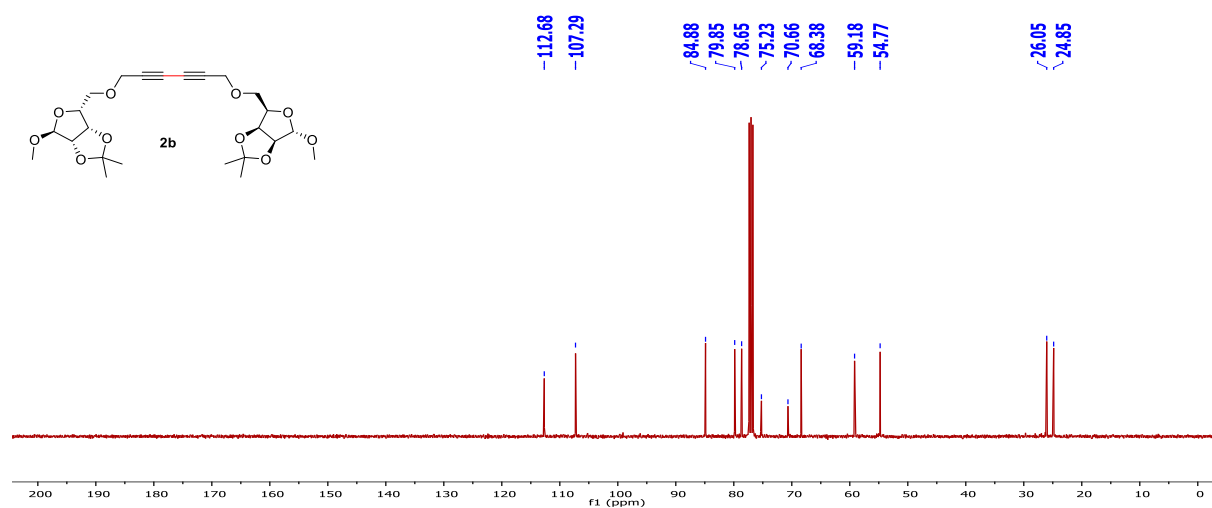

**DEPT 135 (101 MHz,  $\text{CDCl}_3$ ) of 2b**

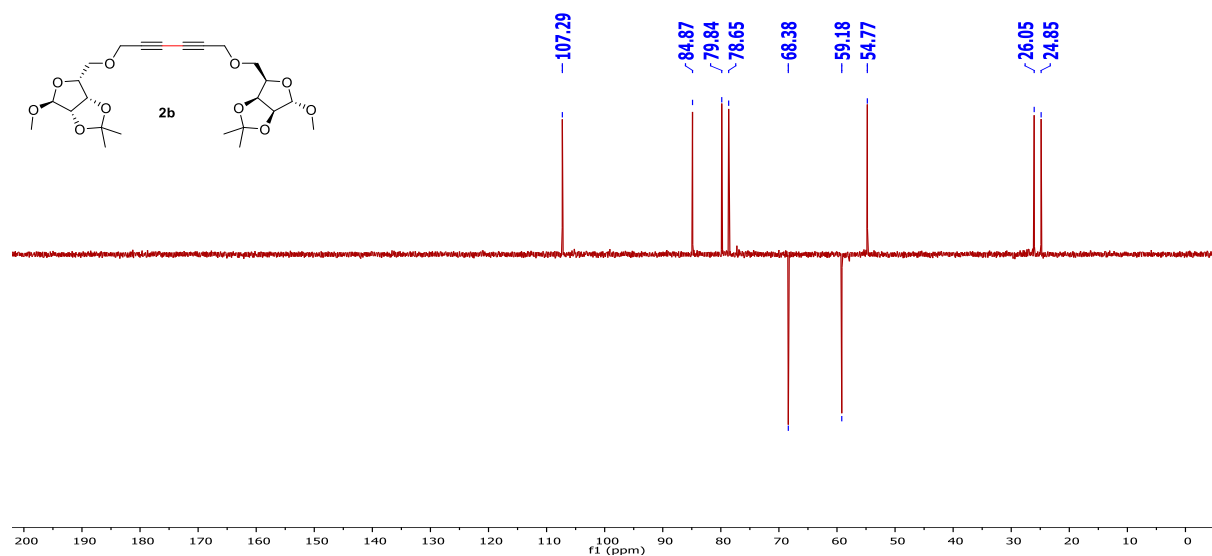



**$^1\text{H}$  NMR (400 MHz,  $\text{CDCl}_3$ ) of **2c****

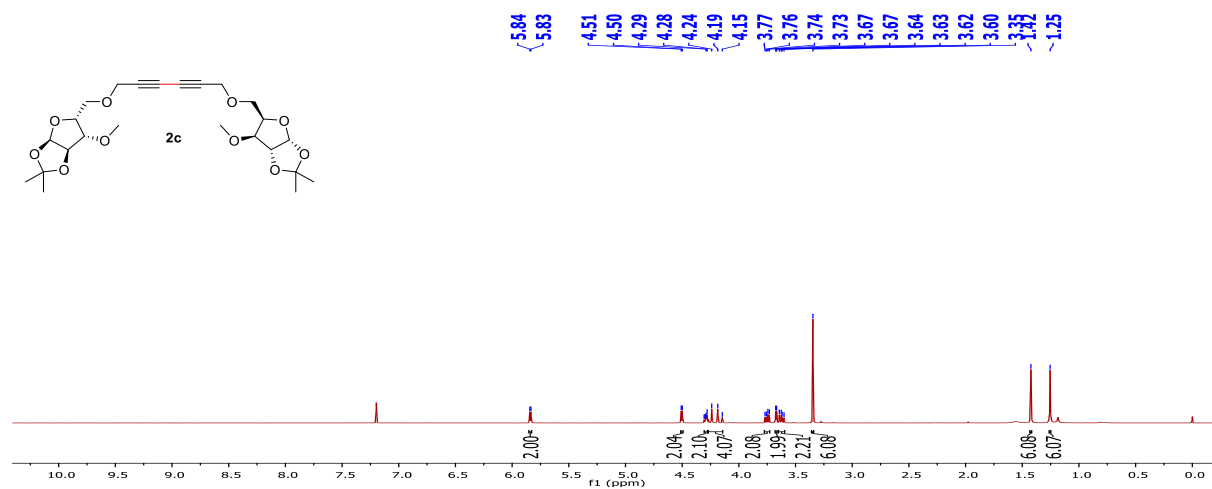

**$^{13}\text{C}$  NMR (400 MHz,  $\text{CDCl}_3$ ) of **2c****

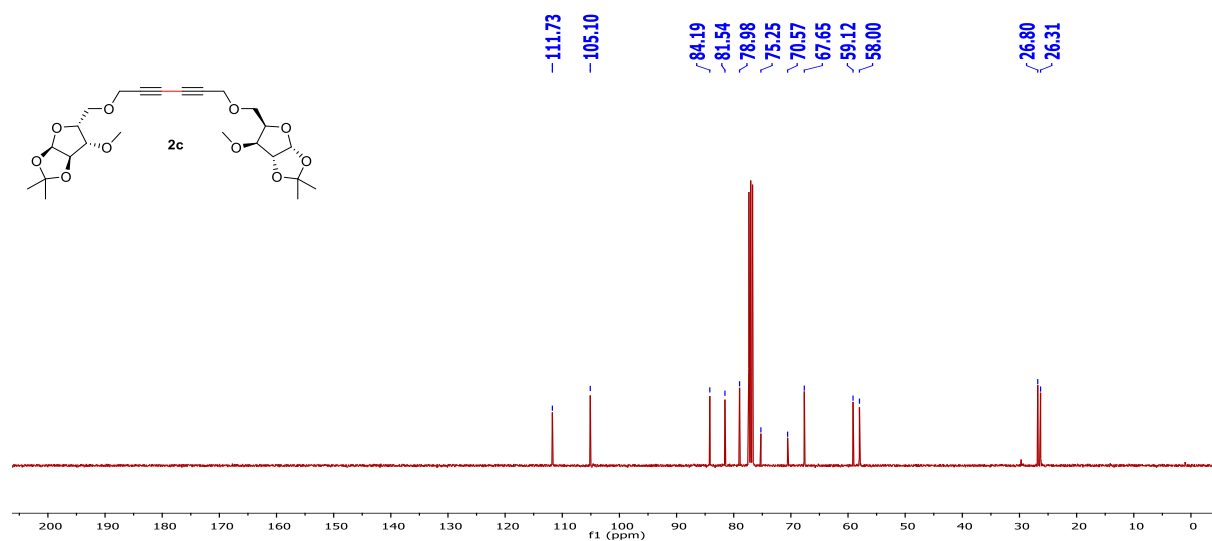

**DEPT 135 (101 MHz,  $\text{CDCl}_3$ ) of **2c****

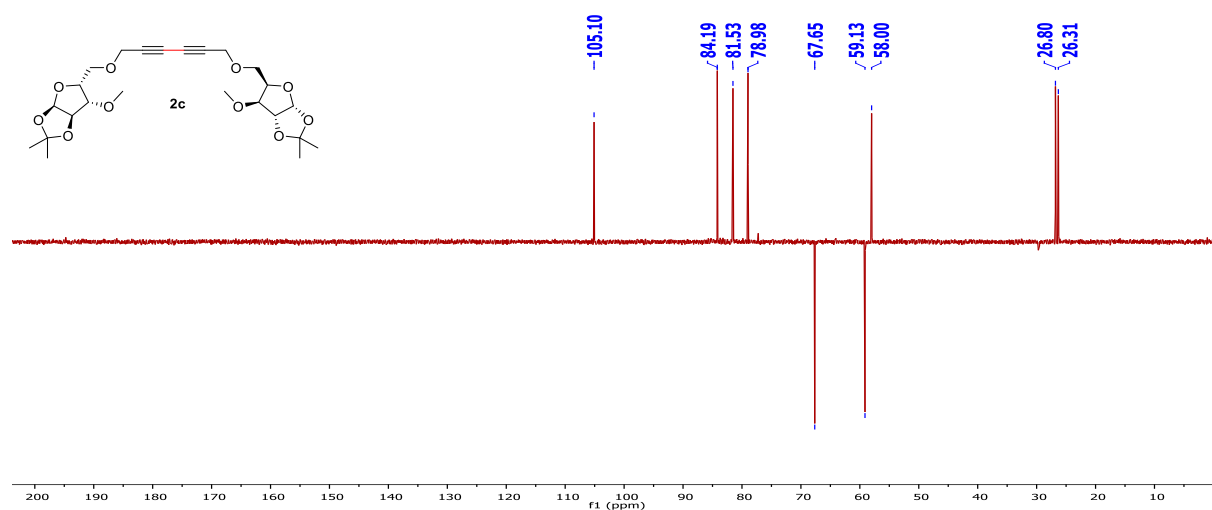



**$^1\text{H}$  NMR (400 MHz,  $\text{CDCl}_3$ ) of 2d**

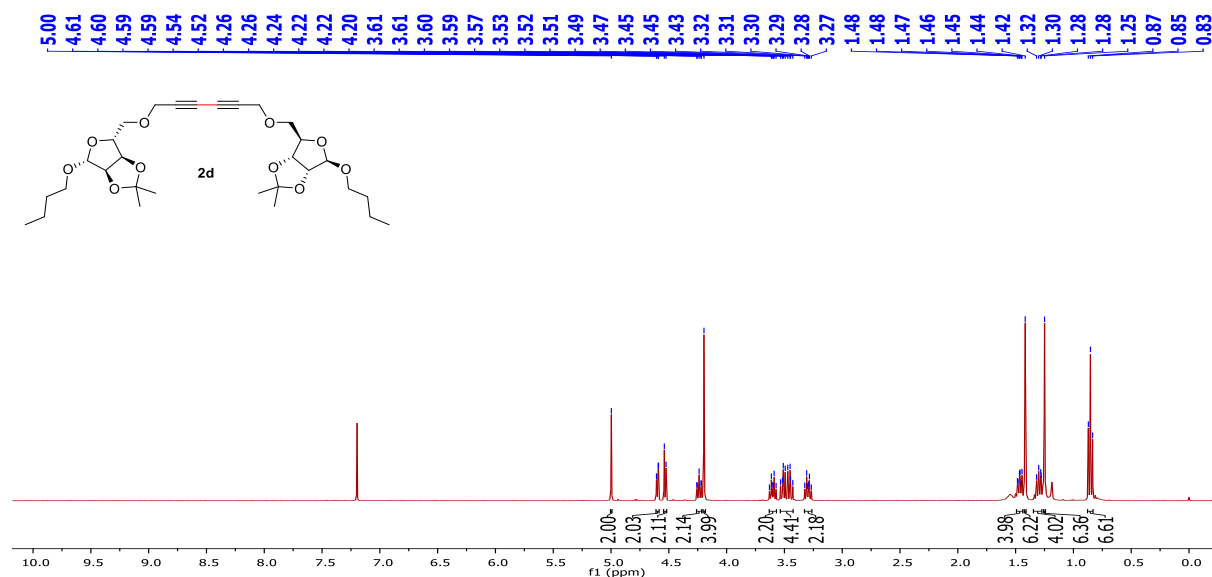

**$^{13}\text{C}$  NMR (400 MHz,  $\text{CDCl}_3$ ) of 2d**

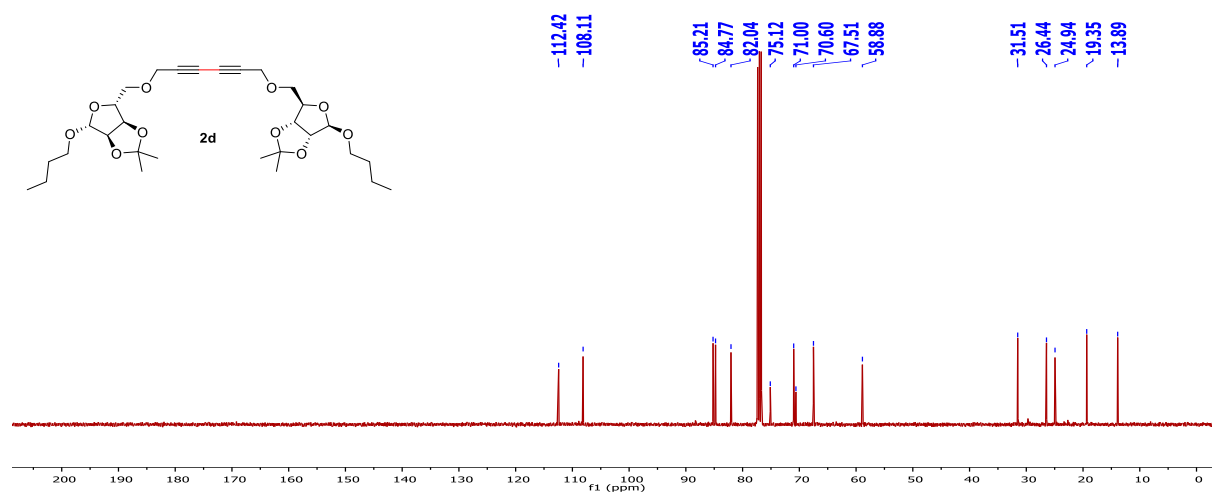

**DEPT 135 (101 MHz,  $\text{CDCl}_3$ ) of 2d**

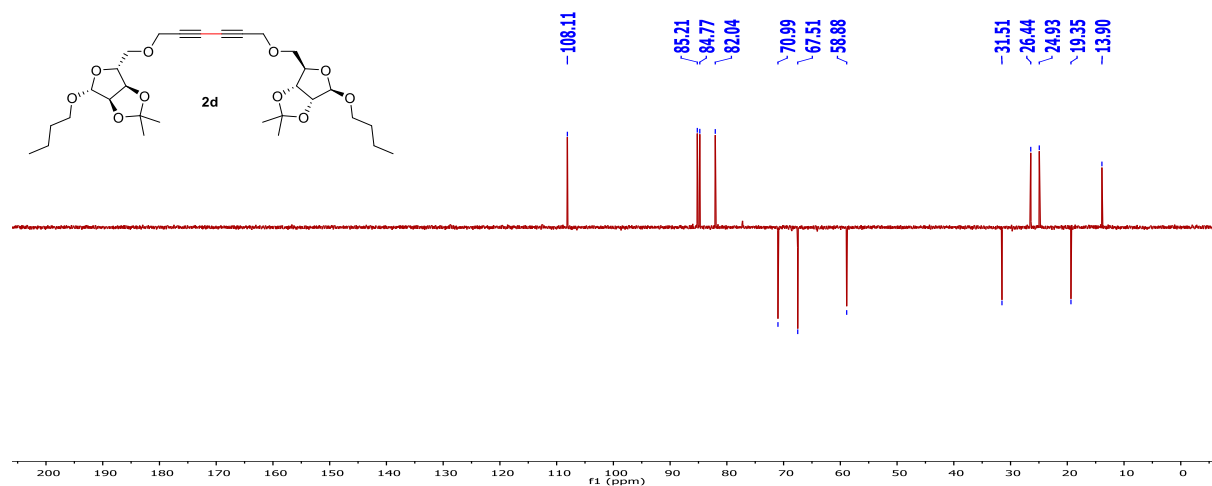



**$^1\text{H}$  NMR (400 MHz,  $\text{CDCl}_3$ ) of 2e**

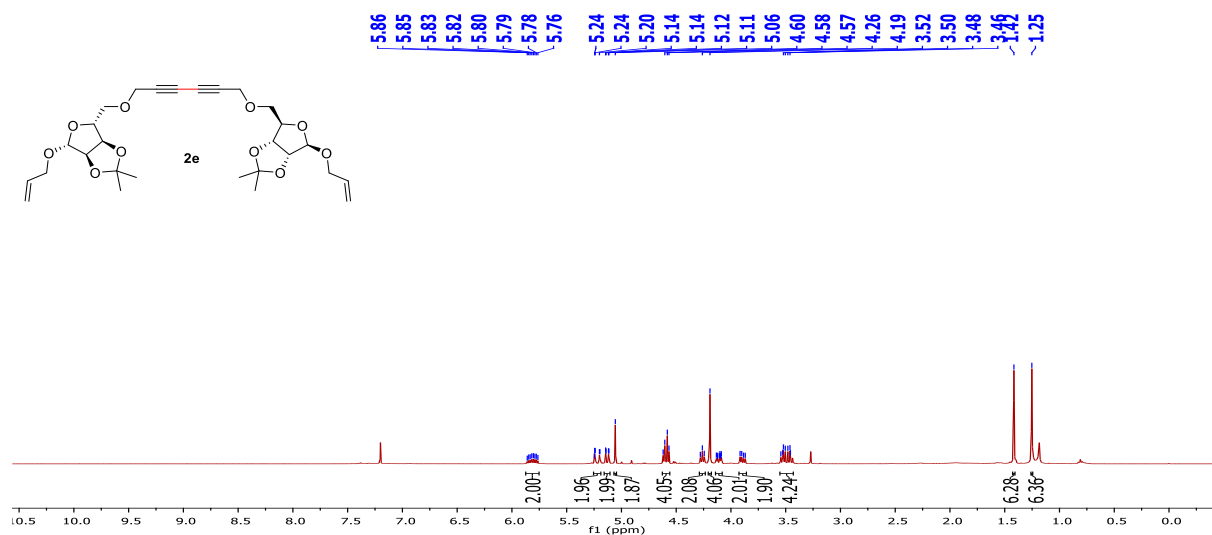

**$^{13}\text{C}$  NMR (400 MHz,  $\text{CDCl}_3$ ) of 2e**

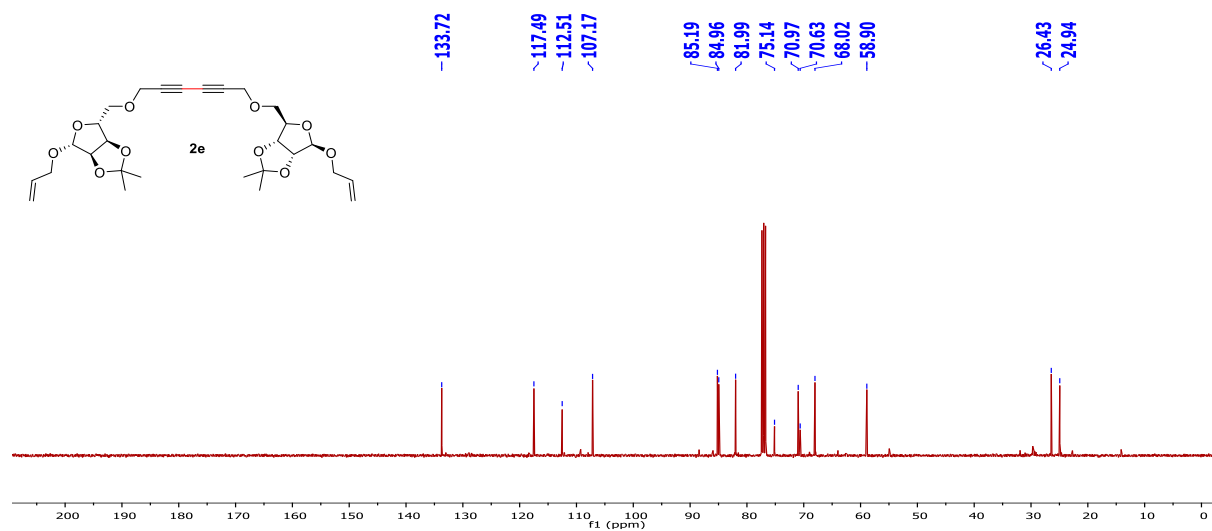

**DEPT 135 (101 MHz,  $\text{CDCl}_3$ ) of 2e**

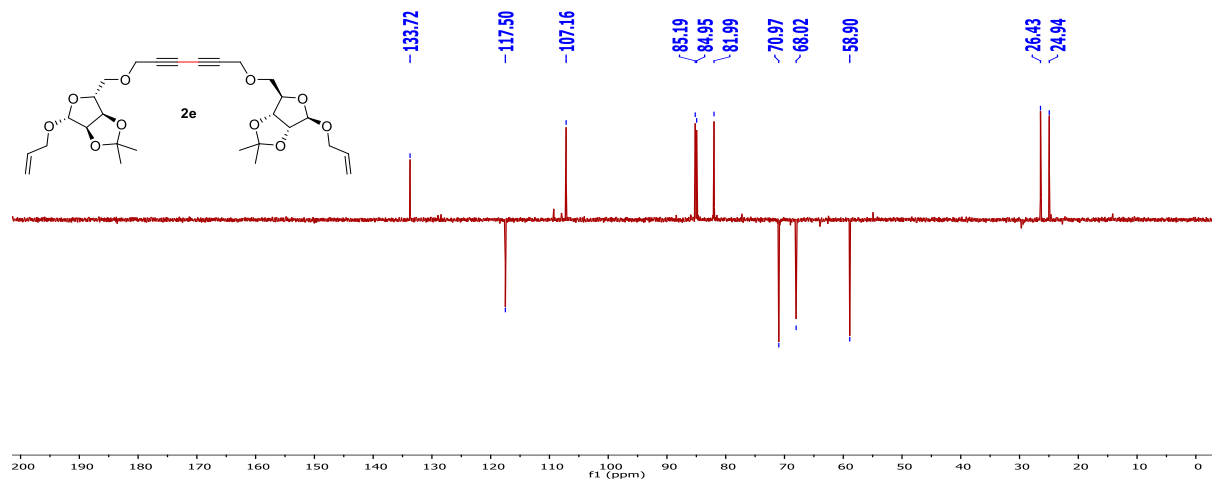



**$^1\text{H}$  NMR (400 MHz,  $\text{CDCl}_3$ ) of 2f**

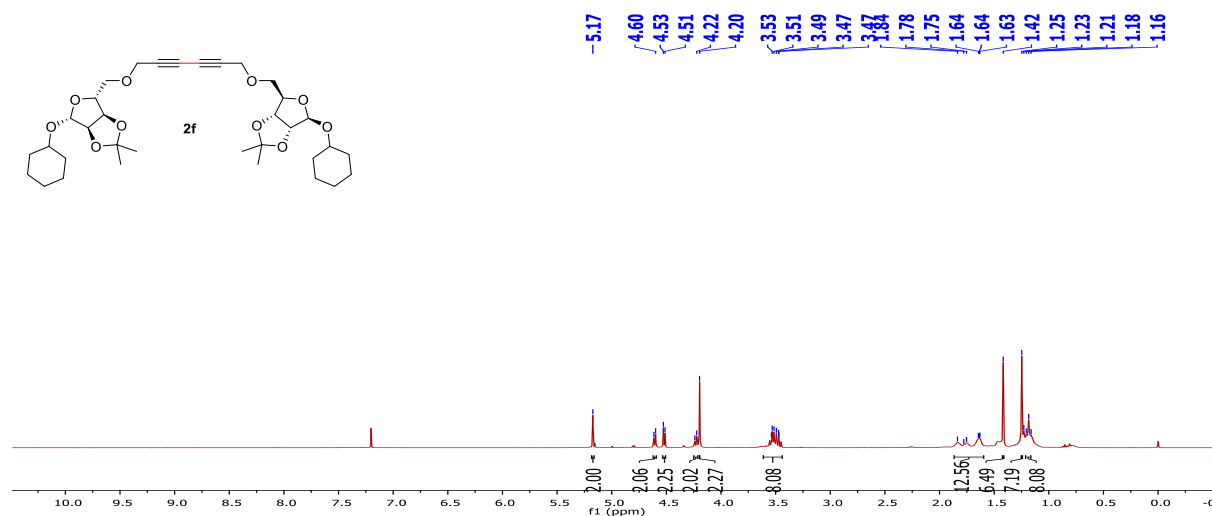

**$^{13}\text{C}$  NMR (400 MHz,  $\text{CDCl}_3$ ) of 2f**

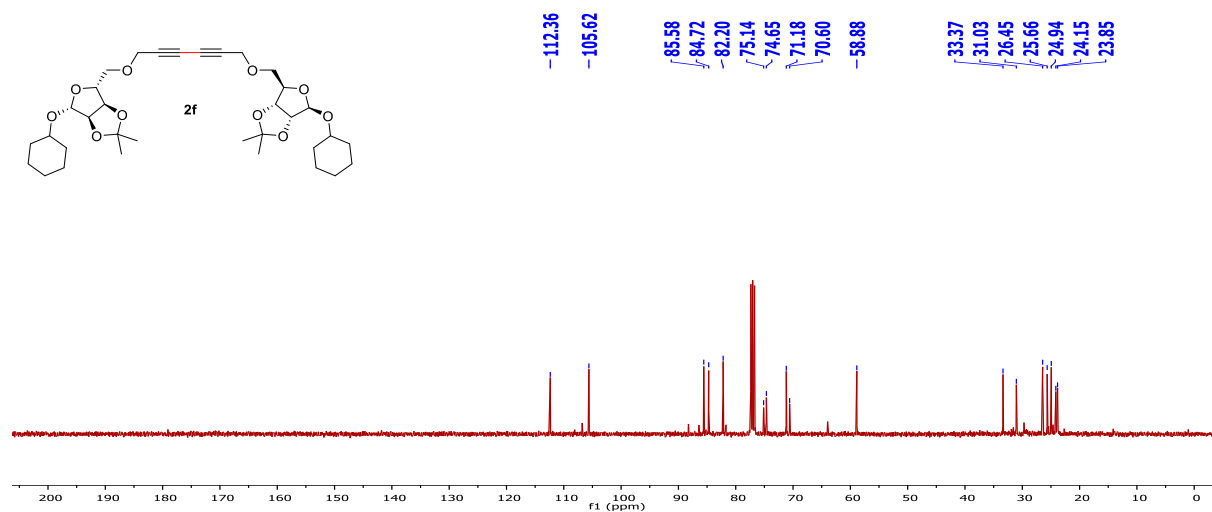

**DEPT 135 (101 MHz,  $\text{CDCl}_3$ ) of 2f**

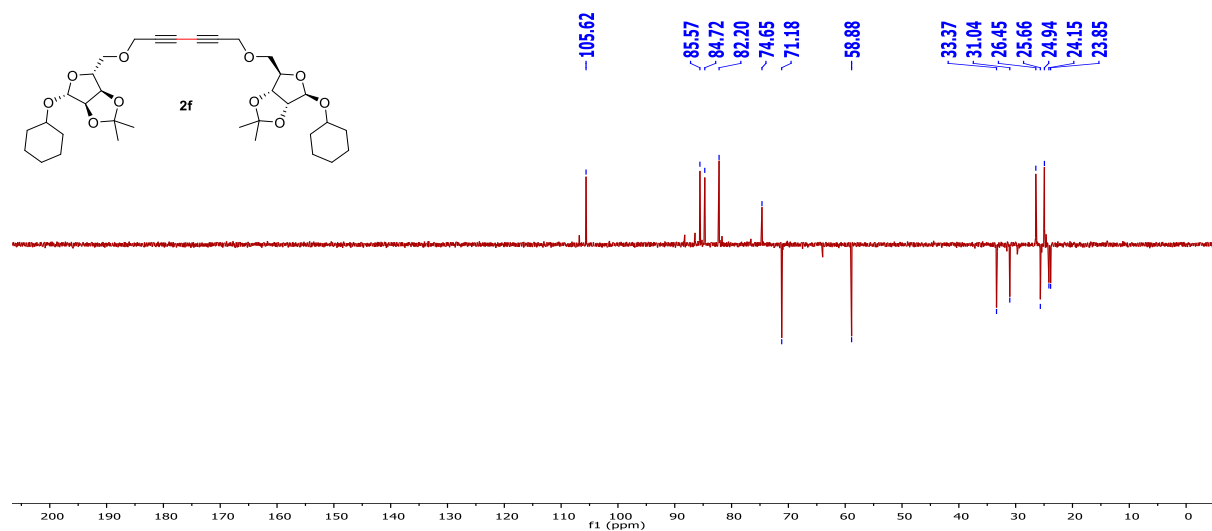



**$^1\text{H}$  NMR (400 MHz,  $\text{CDCl}_3$ ) of 2g**

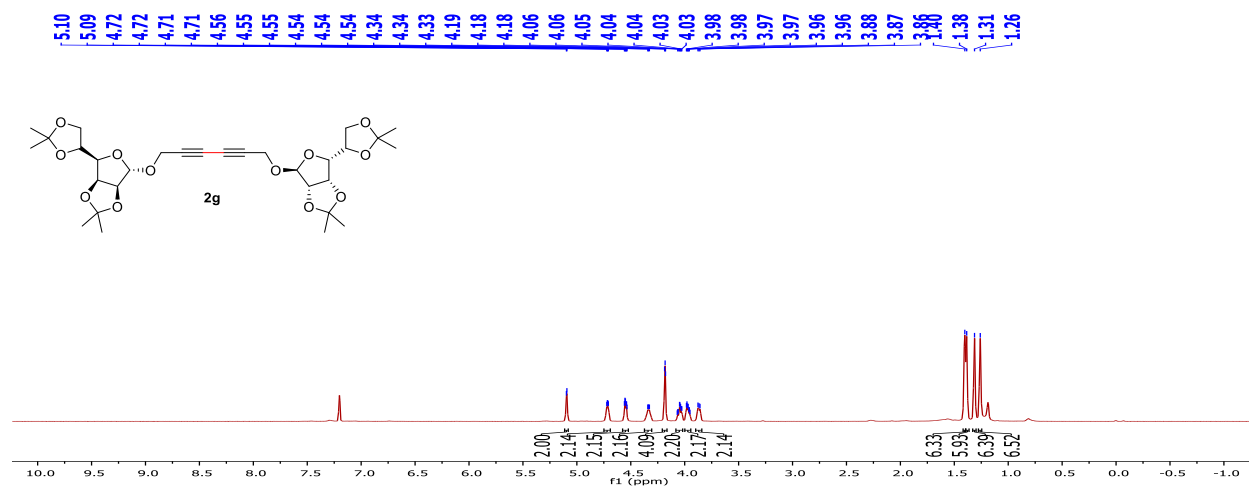

**$^{13}\text{C}$  NMR (400 MHz,  $\text{CDCl}_3$ ) of 2g**

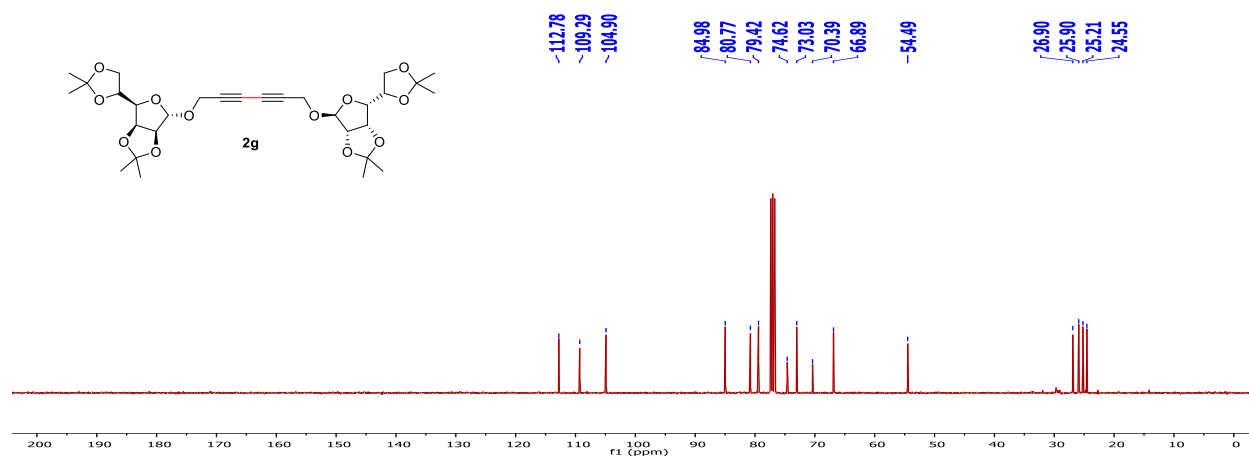

**DEPT 135 (101 MHz,  $\text{CDCl}_3$ ) of 2g**

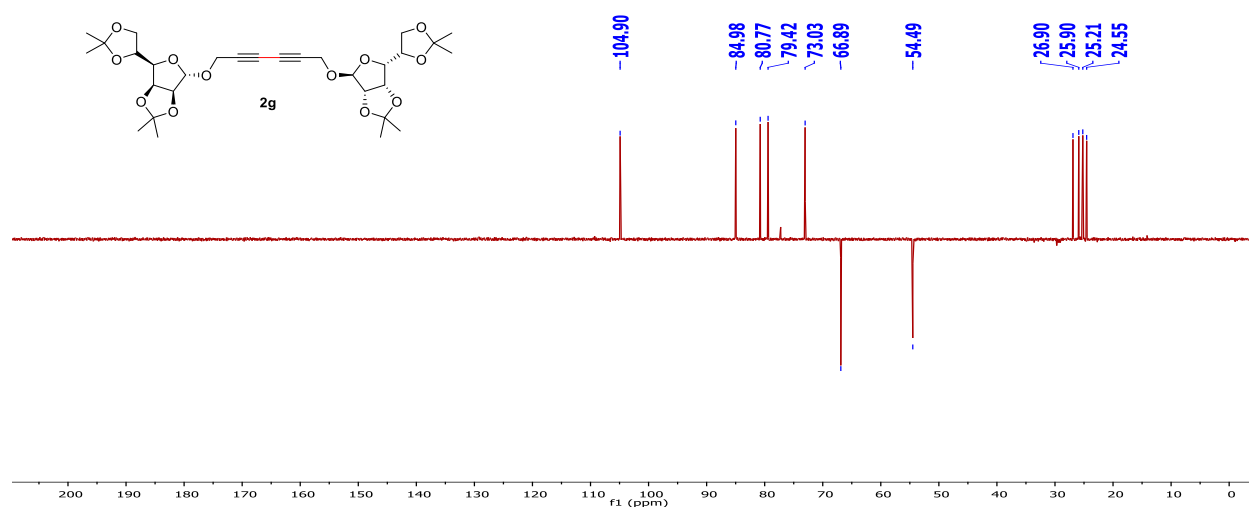



Chemical structure of compound 2h is shown above the <sup>1</sup>H NMR spectrum. The structure features two chiral sugar units linked by a central alkyne group. The sugar units are substituted with a tert-butyl group and a methoxy group. The <sup>1</sup>H NMR spectrum (CDCl<sub>3</sub>) shows peaks corresponding to the structure, with chemical shifts (ppm) labeled above the peaks: 5.88, 5.87, 4.60, 4.59, 4.38, 4.24, 4.14, 4.13, 4.11, 4.11, 4.11, 4.10, 4.09, 4.08, 4.08, 4.07, 4.01, 4.00, 3.99, 1.50, 1.43, 1.36, and 1.32. Integration values are shown below the peaks: 2.00, 2.23, 4.17, 2.26, 4.04, 2.26, 2.23, 6.24, 6.07, 6.20, and 6.07.

Chemical structure of compound **2h** is shown above the  $^{13}\text{C}$  NMR spectrum. The spectrum displays peaks corresponding to the structure, with the following chemical shifts (ppm) labeled above the peaks:

- 111.98
- 109.12
- 105.23
- 82.81
- 81.73
- 81.04
- 75.11
- 72.43
- 70.59
- 67.30
- 58.60
- 26.86
- 26.83
- 26.26
- 25.37

Chemical structure of compound **2h** is shown, which is a bis-sugar derivative. The structure features two identical sugar units linked by a central alkyne group. Each sugar unit is a substituted furanose ring with a tert-butyl group and a methoxy group. The chemical structure is labeled **2h**.

The <sup>13</sup>C NMR spectrum (CDCl<sub>3</sub>) shows the following chemical shifts (ppm):

- 105.23
- 82.81
- 81.73
- 81.03
- 72.43
- 67.30
- 58.60
- 26.86
- 26.83
- 26.26
- 25.37

The spectrum displays a series of peaks corresponding to these chemical shifts, with the alkyne carbons appearing as a triplet around 80 ppm and the sugar carbons appearing as a complex set of peaks between 25 and 105 ppm.



**$^1\text{H}$  NMR (400 MHz,  $\text{CDCl}_3$ ) of 2i**

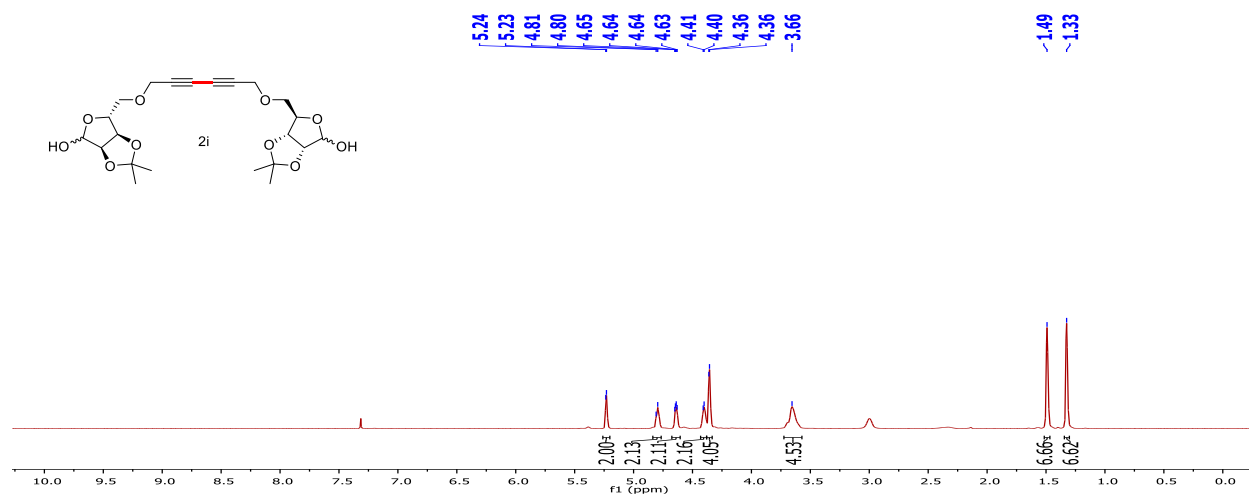

**$^{13}\text{C}$  NMR (400 MHz,  $\text{CDCl}_3$ ) of 2i**

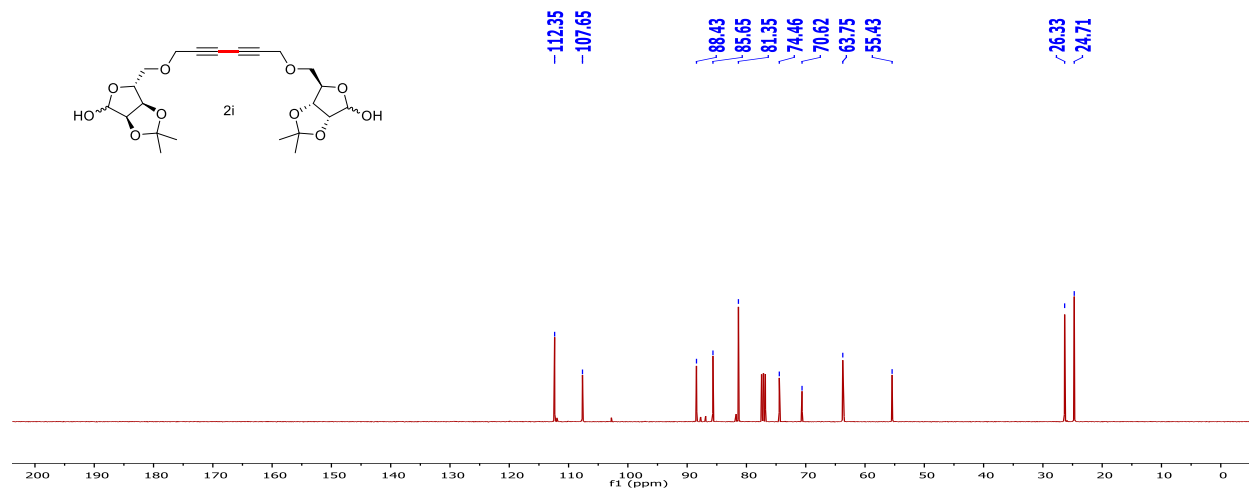

**DEPT 135 (101 MHz,  $\text{CDCl}_3$ ) of 2i**

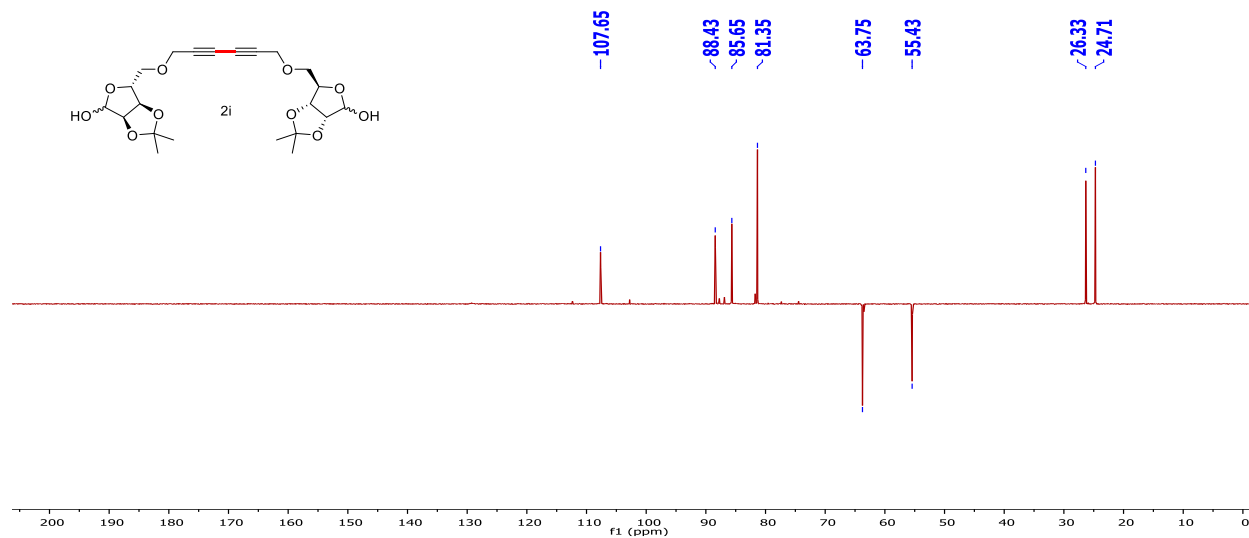



**<sup>1</sup>H NMR (400 MHz, CDCl<sub>3</sub>) of 2j**

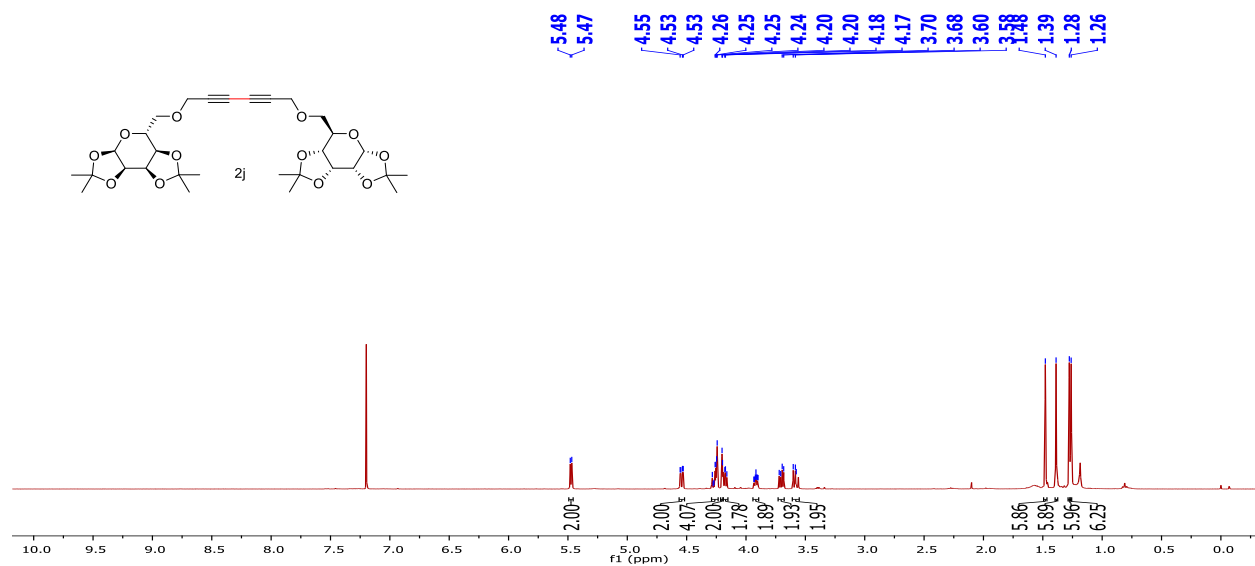

**<sup>13</sup>C NMR (400 MHz, CDCl<sub>3</sub>) of 2j**

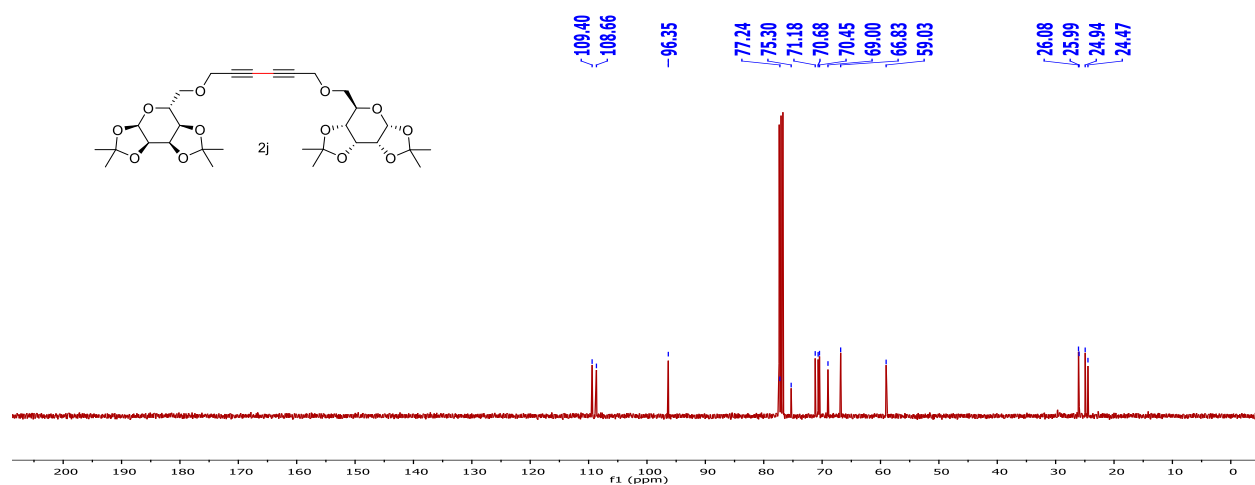

**DEPT 135 (101 MHz, CDCl<sub>3</sub>) of 2j**

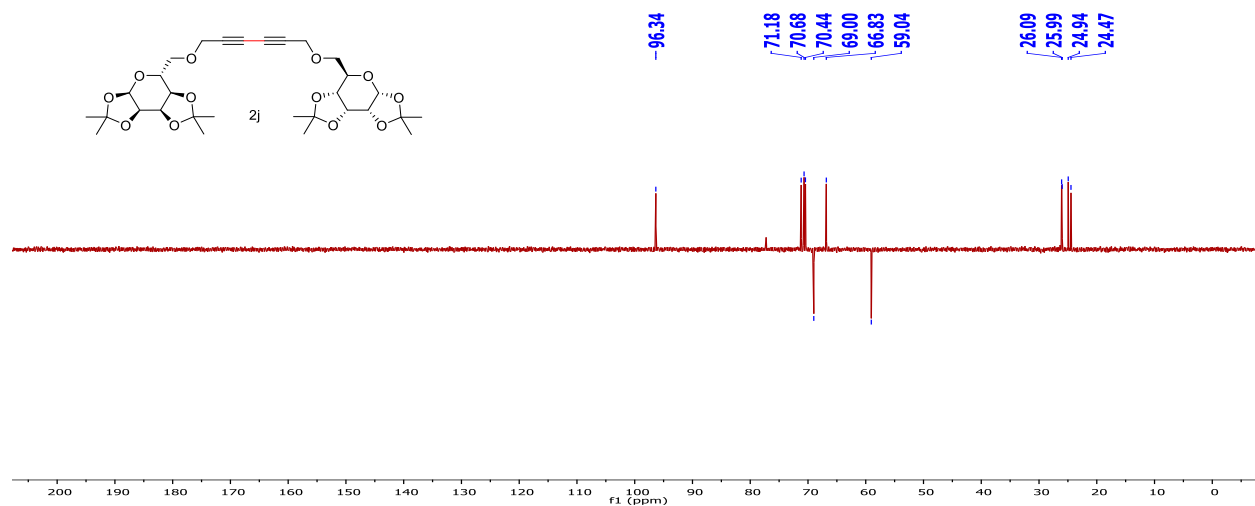



Chemical structure of compound 2k is shown above the <sup>1</sup>H NMR spectrum. The structure is a dimeric molecule consisting of two 1,3-dioxolane rings linked by a central 1,4-bis(alkynyl)oxy chain. Each dioxolane ring is substituted with a cyclohexyl group and a methoxy group. The <sup>1</sup>H NMR spectrum (CDCl<sub>3</sub>) displays peaks corresponding to the structure, with chemical shifts (ppm) and integrations provided for each signal.

| Chemical Shift (ppm) | Integration |
|----------------------|-------------|
| 7.20                 | 2.00        |
| 4.50                 | 2.08        |
| 4.15                 | 4.16        |
| 4.05                 | 4.14        |
| 3.95                 | 2.13        |
| 3.80                 | 2.04        |
| 3.65                 | 2.01        |
| 1.50                 | 4.34        |
| 1.40                 | 4.61        |
| 1.30                 | 7.72        |
| 1.20                 | 16.65       |
| 1.10                 | 8.11        |

Chemical structure of **2k** is shown, which is a dimeric molecule consisting of two 1,3-dioxolane rings linked by a central alkyne group. The structure is labeled **2k**.

The <sup>13</sup>C NMR spectrum (CDCl<sub>3</sub>) of **2k** is displayed below the structure. The x-axis represents the chemical shift in ppm, ranging from 0 to 200. The spectrum shows several peaks, with the following chemical shifts (ppm) labeled above the corresponding peaks:

- 109.95
- 109.23
- 95.96
- 75.35
- 70.79
- 70.56
- 70.38
- 70.09
- 69.09
- 66.83
- 58.99
- 35.65
- 34.25
- 34.00
- 25.16
- 25.01
- 23.99
- 23.86
- 23.74
- 23.55

The spectrum shows a complex pattern of peaks, with a prominent peak at 75.35 ppm and several smaller peaks in the 20-40 ppm range.

Chemical structure of compound **2k** is shown above the spectrum. The structure features two cyclohexane rings, each fused to a tetrahydrofuran ring, connected by a central alkyne chain. The spectrum displays the  $^1\text{H}$  NMR peaks in  $\text{CDCl}_3$ , with the following chemical shifts (ppm) labeled above the peaks:

| Chemical Shift (ppm) |
|----------------------|
| 95.96                |
| 70.78                |
| 70.37                |
| 70.09                |
| 69.09                |
| 66.83                |
| 58.99                |
| 35.64                |
| 34.24                |
| 33.99                |
| 25.16                |
| 25.01                |
| 23.99                |
| 23.86                |
| 23.74                |
| 23.55                |



**<sup>1</sup>H NMR (400 MHz, CDCl<sub>3</sub>) of 3a**

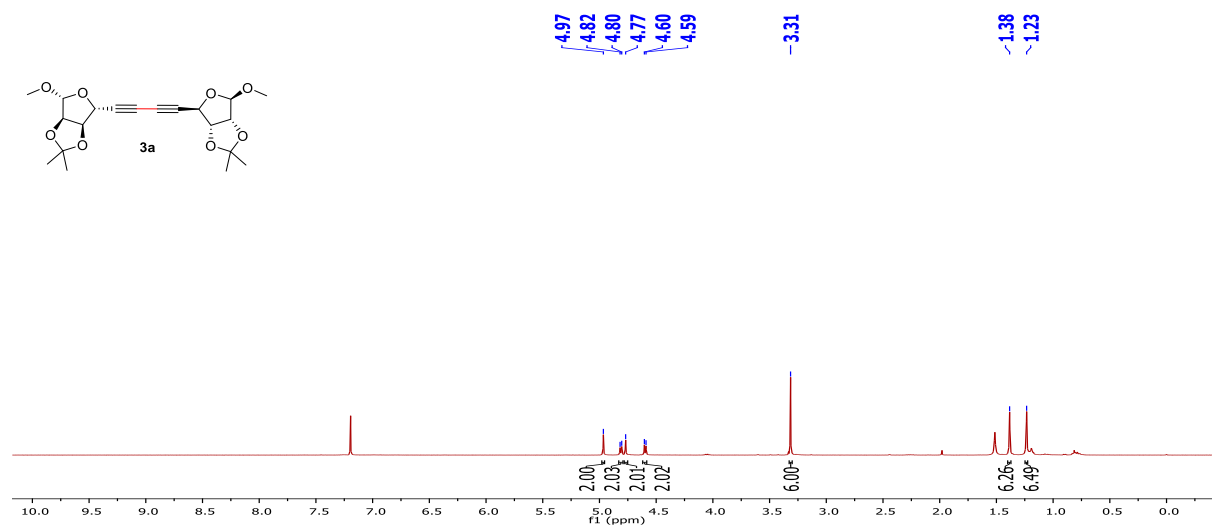

**<sup>13</sup>C NMR (400 MHz, CDCl<sub>3</sub>) of 3a**

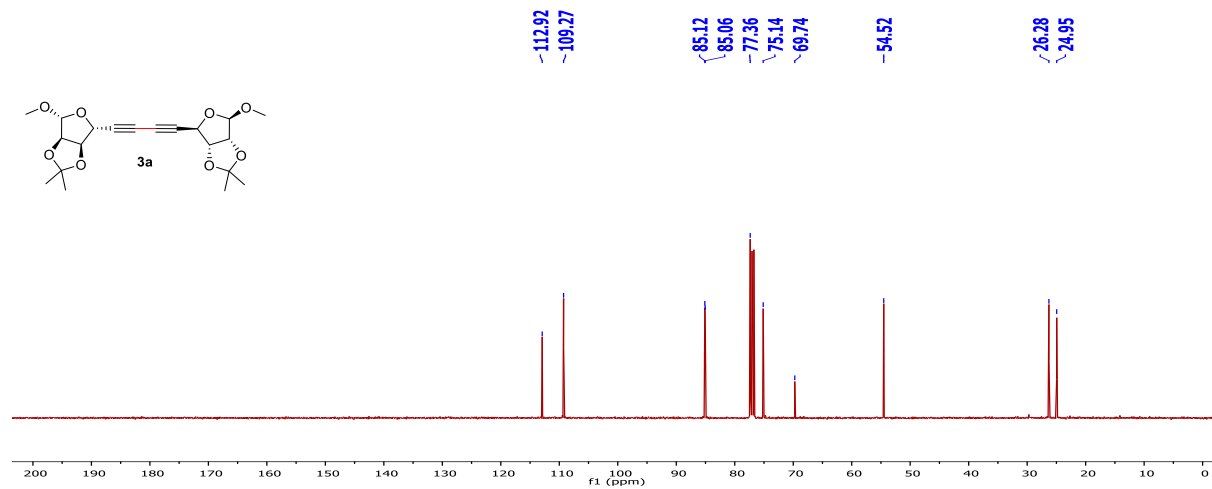

**DEPT 135 (101 MHz, CDCl<sub>3</sub>) of 3a**

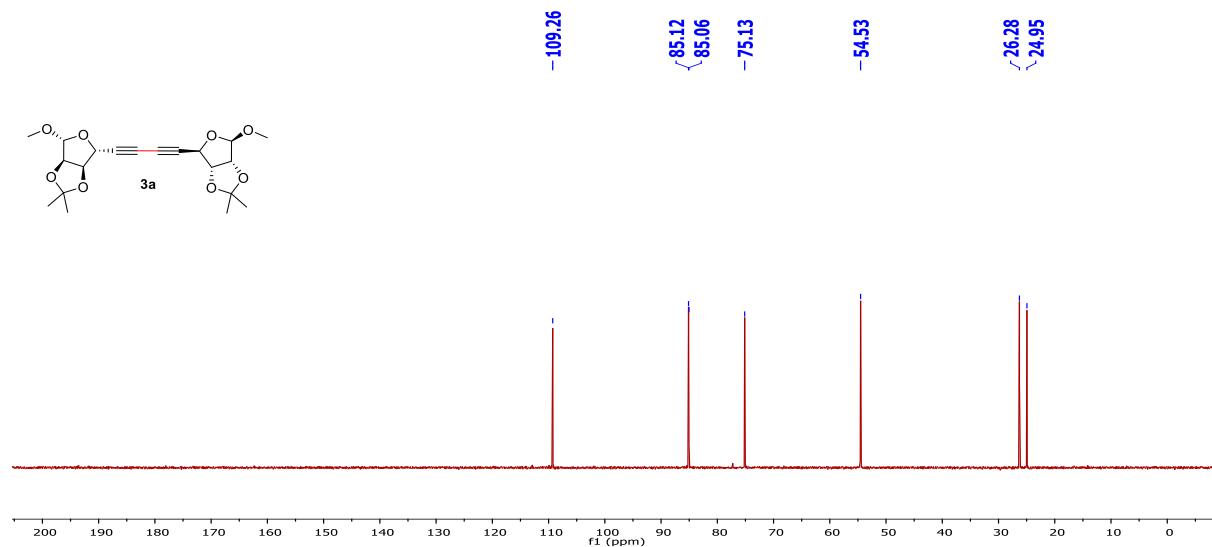



**$^1\text{H}$  NMR (400 MHz,  $\text{CDCl}_3$ ) of 3b**

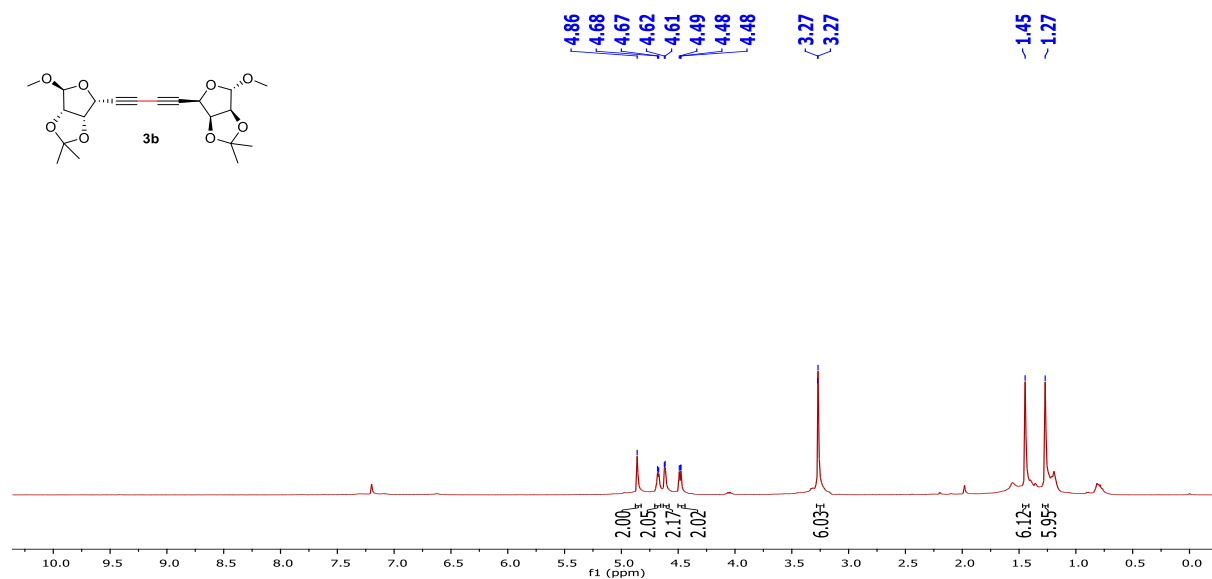

**$^{13}\text{C}$  NMR (400 MHz,  $\text{CDCl}_3$ ) of 3b**

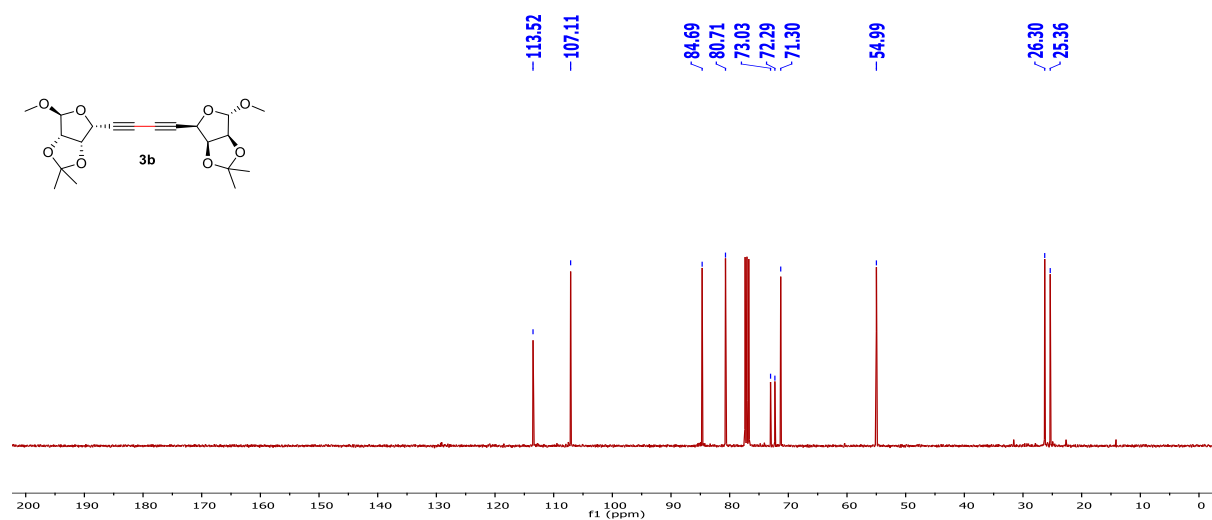

**DEPT 135 (101 MHz,  $\text{CDCl}_3$ ) of 3b**

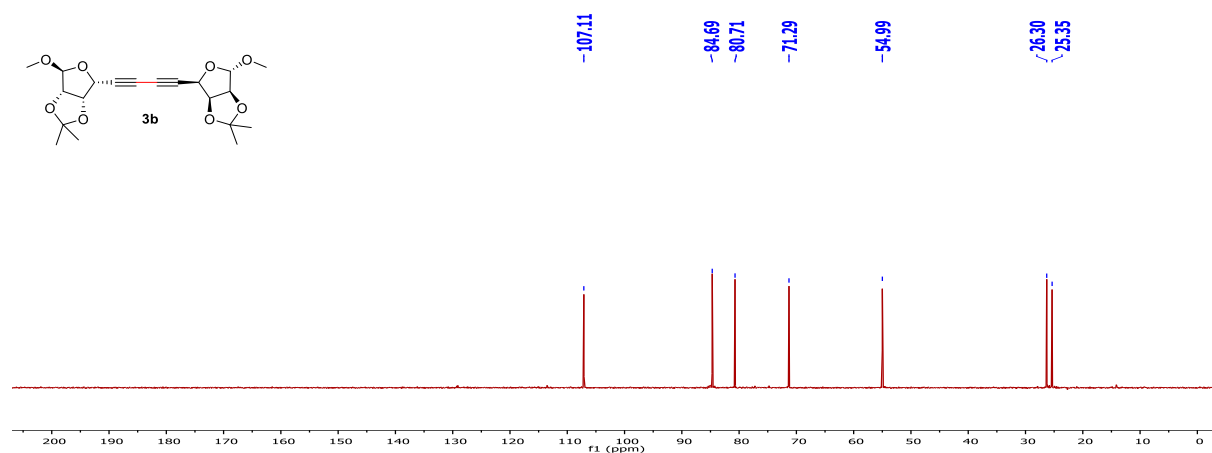



**$^1\text{H}$  NMR (400 MHz,  $\text{CDCl}_3$ ) of 3c**

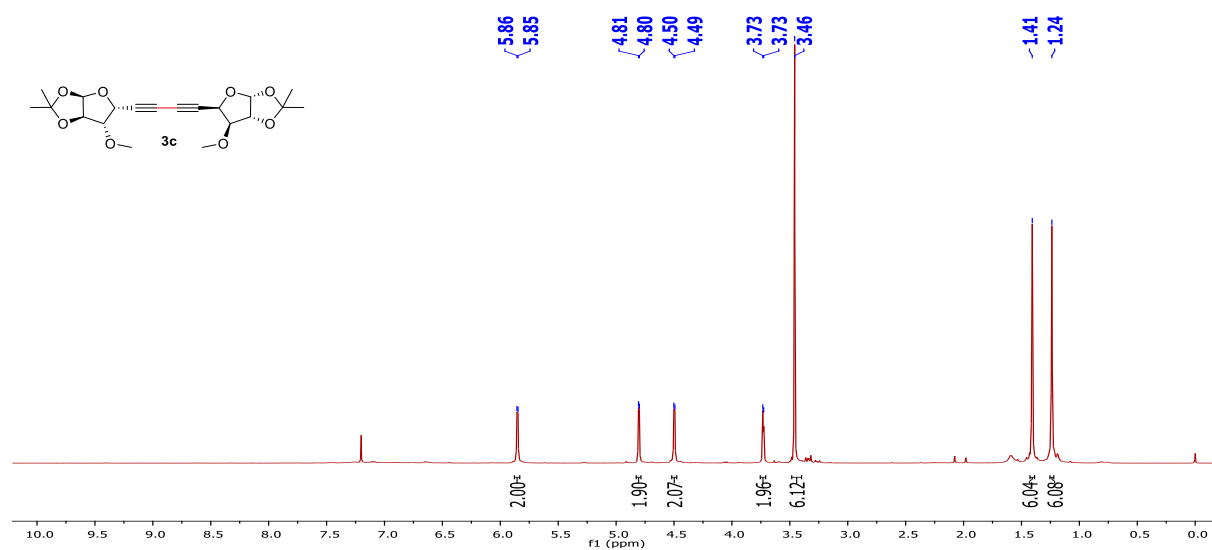

**$^{13}\text{C}$  NMR (400 MHz,  $\text{CDCl}_3$ ) of 3c**

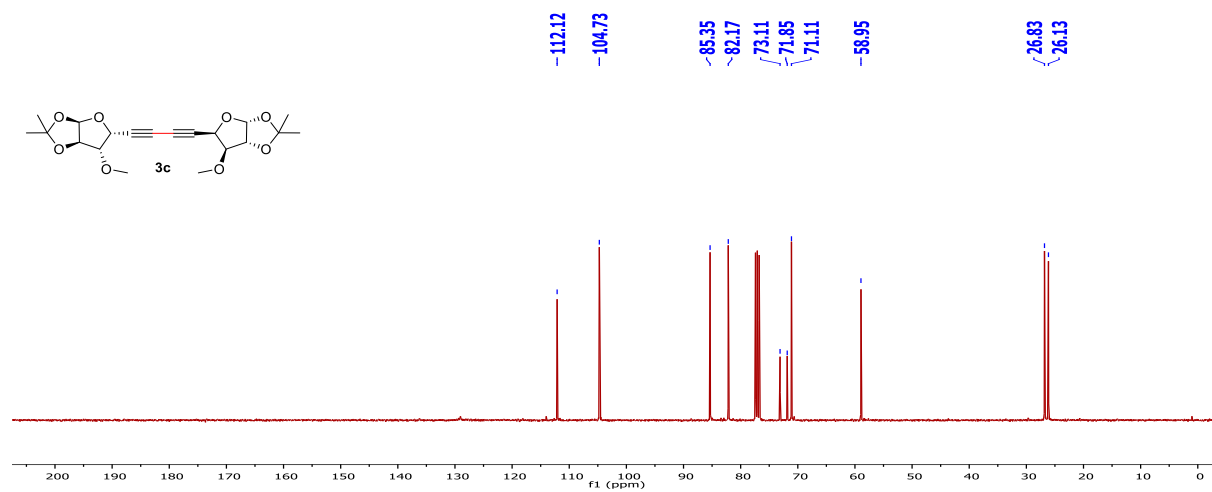

**DEPT 135 (101 MHz,  $\text{CDCl}_3$ ) of 3c**

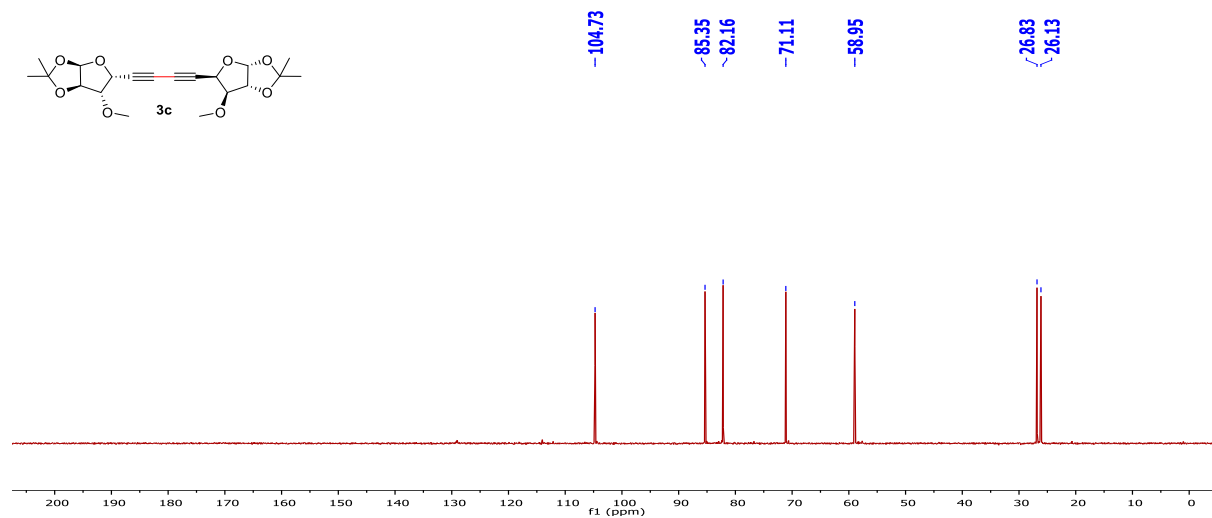



# <sup>1</sup>H NMR (400 MHz, CDCl<sub>3</sub>) of 3d

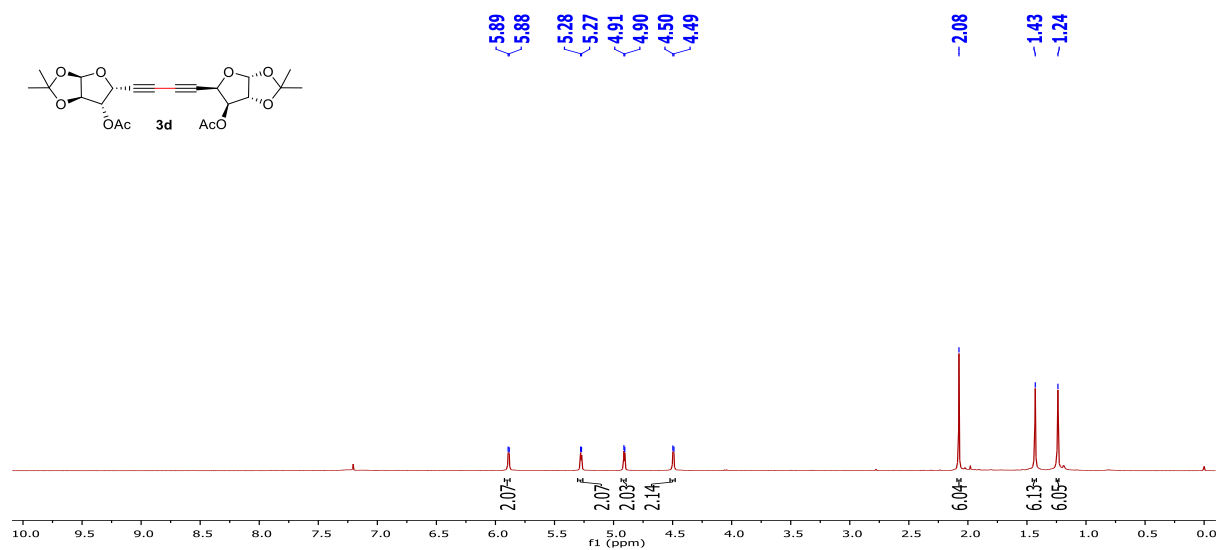

# <sup>13</sup>C NMR (400 MHz, CDCl<sub>3</sub>) of 3d

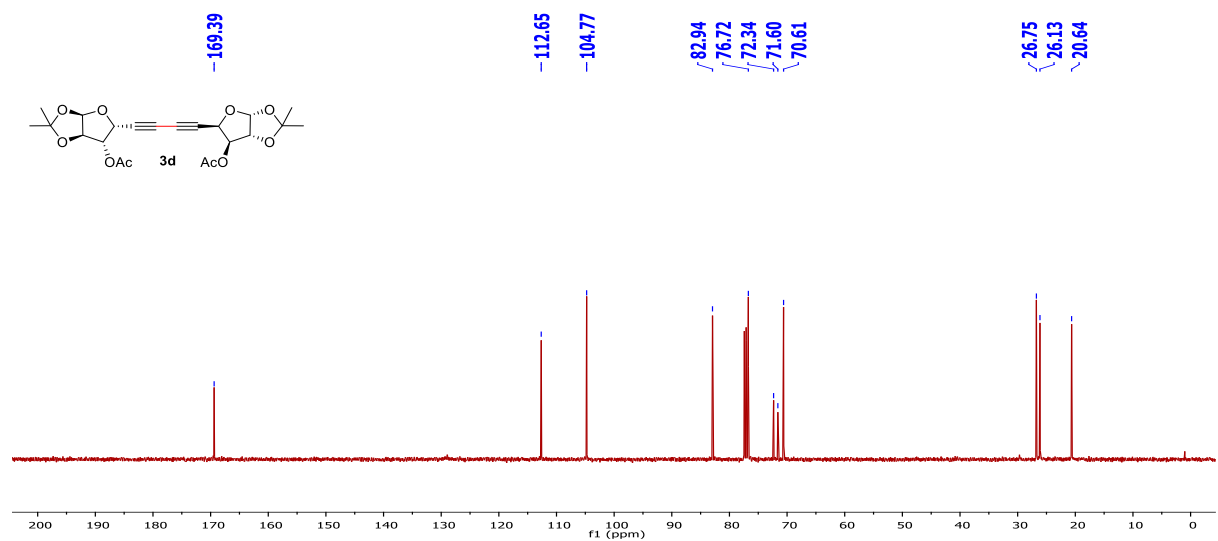

# DEPT 135 (101 MHz, CDCl<sub>3</sub>) of 3d

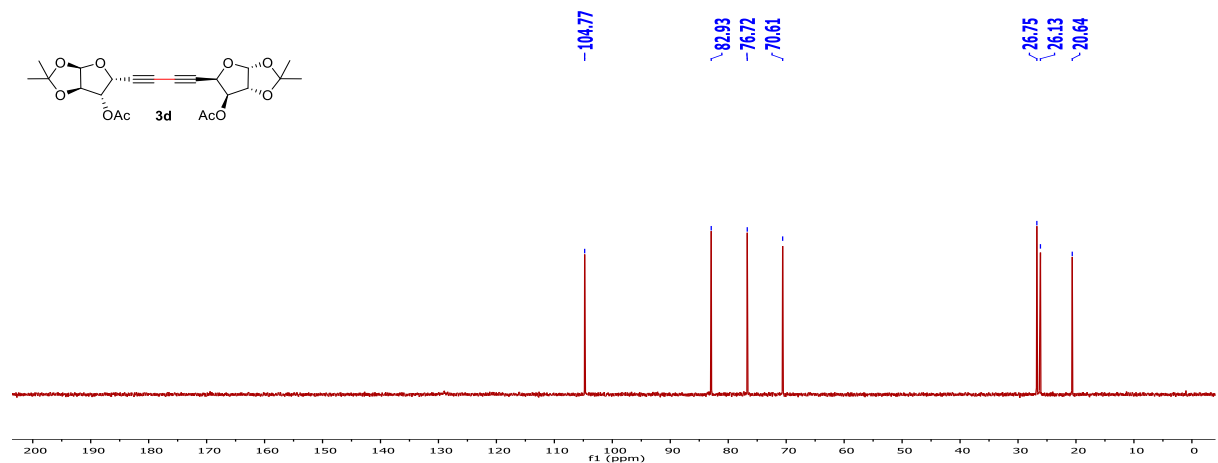



**$^1\text{H}$  NMR (400 MHz,  $\text{CDCl}_3$ ) of 3e**

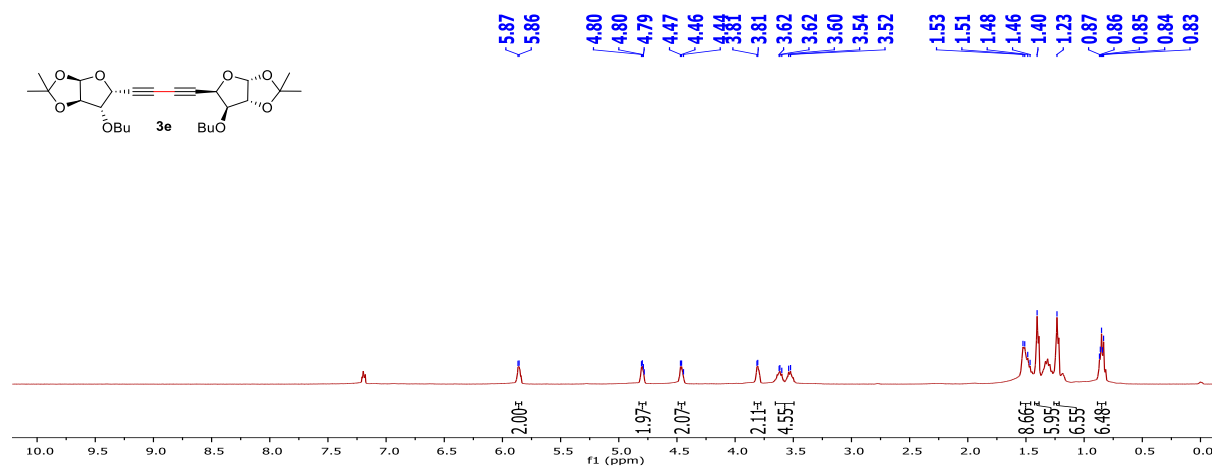

**$^{13}\text{C}$  NMR (400 MHz,  $\text{CDCl}_3$ ) of 3e**

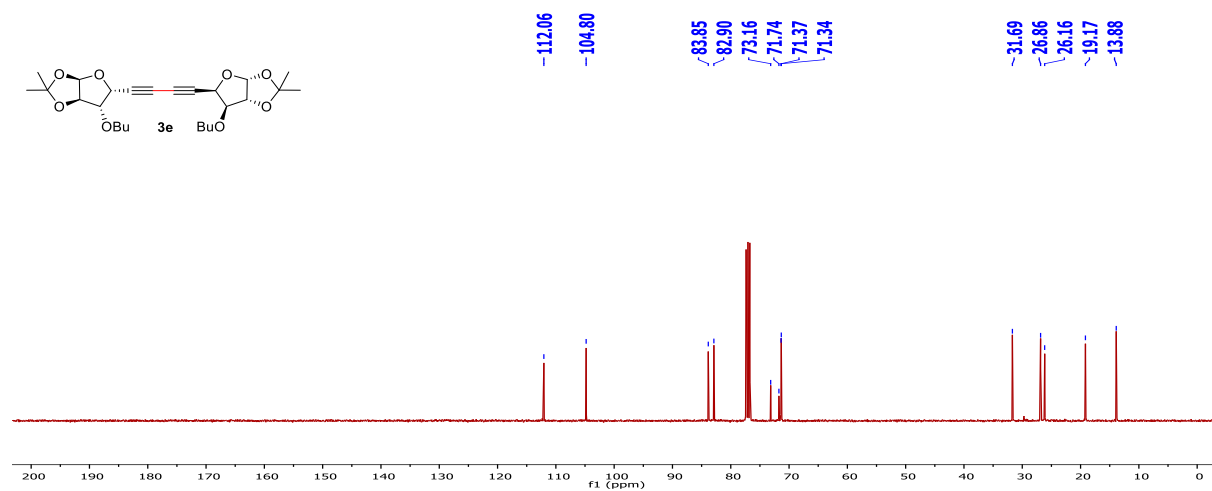

**DEPT 135 (101 MHz,  $\text{CDCl}_3$ ) of 3e**

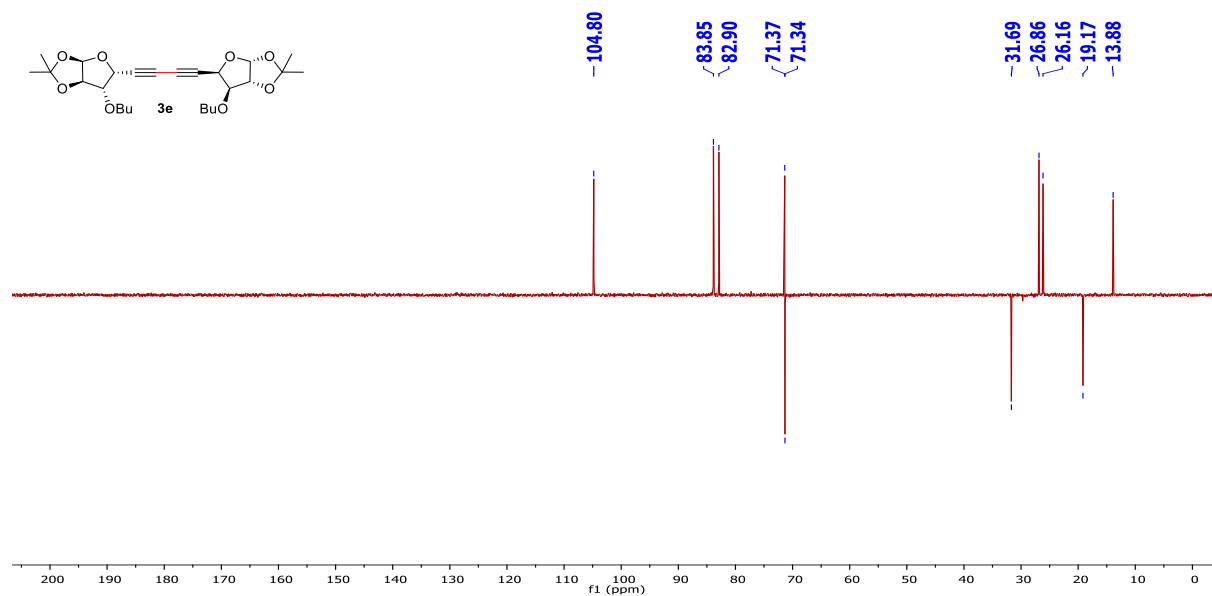



**<sup>1</sup>H NMR (400 MHz, CDCl<sub>3</sub>) of 3f**

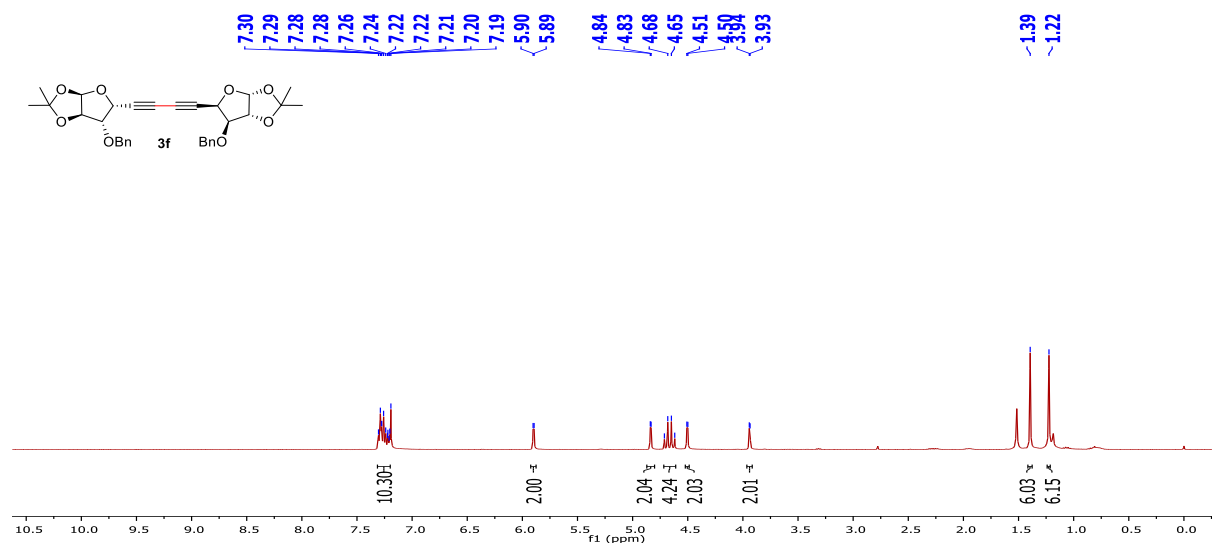

**<sup>13</sup>C NMR (400 MHz, CDCl<sub>3</sub>) of 3f**

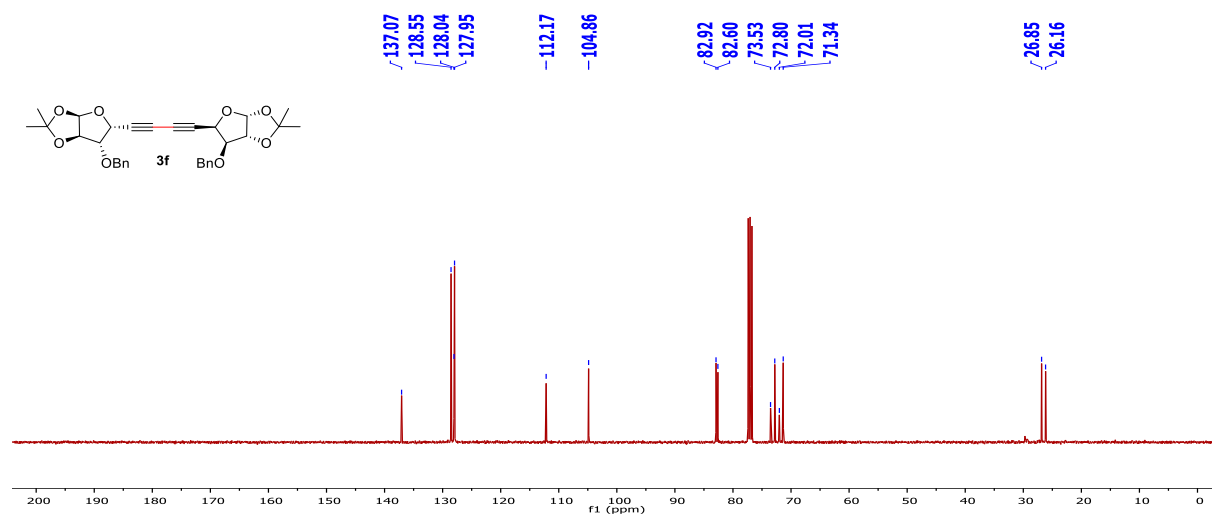

**DEPT 135 (101 MHz, CDCl<sub>3</sub>) of 3f**

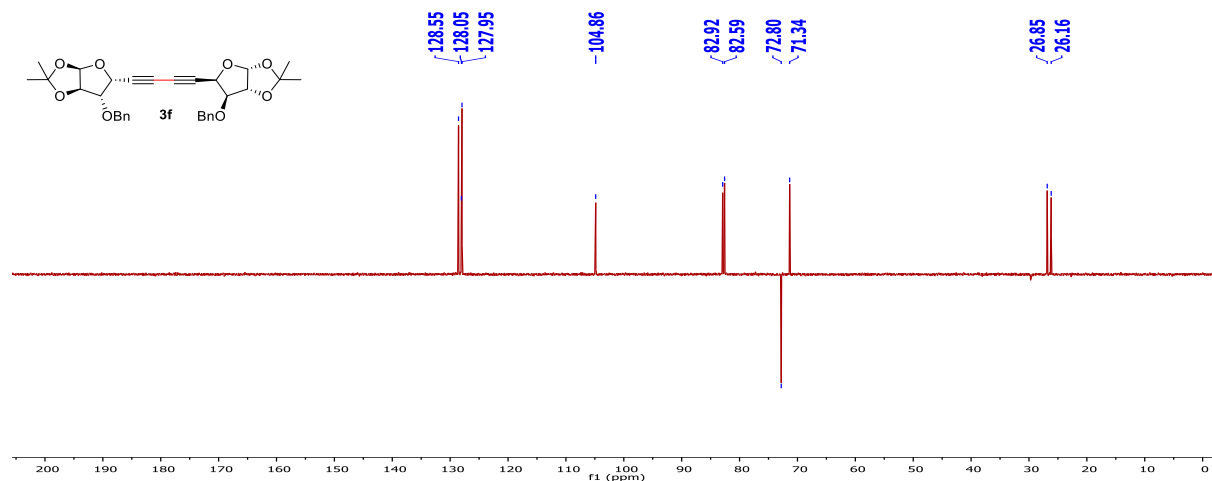



**$^1\text{H}$  NMR (400 MHz,  $\text{CDCl}_3$ ) of 4a**

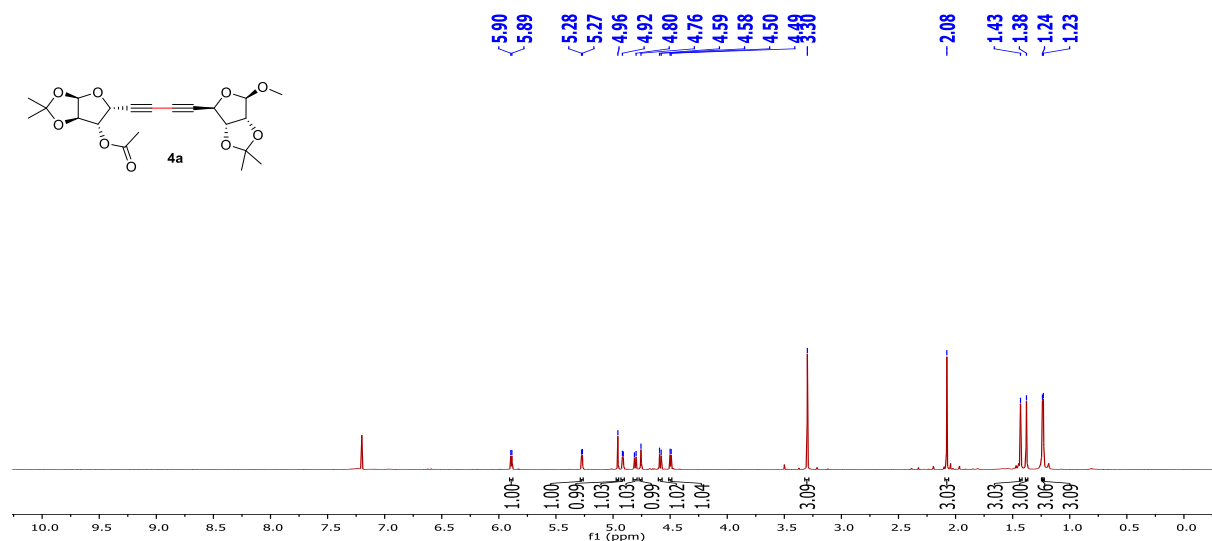

**$^{13}\text{C}$  NMR (400 MHz,  $\text{CDCl}_3$ ) of 4a**

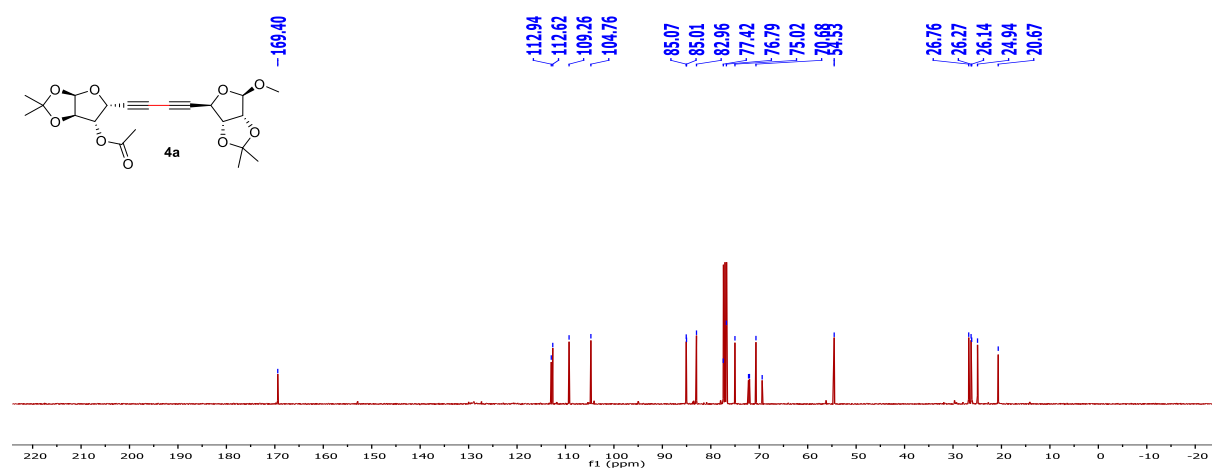

**DEPT 135 (101 MHz,  $\text{CDCl}_3$ ) of 4a**

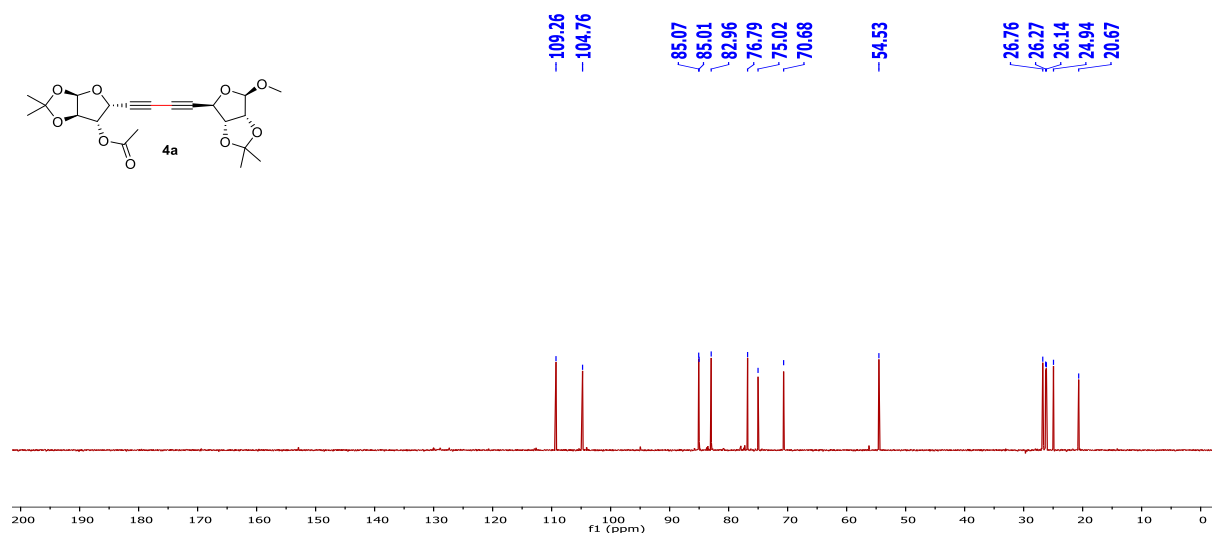



**$^1\text{H}$  NMR (400 MHz,  $\text{CDCl}_3$ ) of 5a**

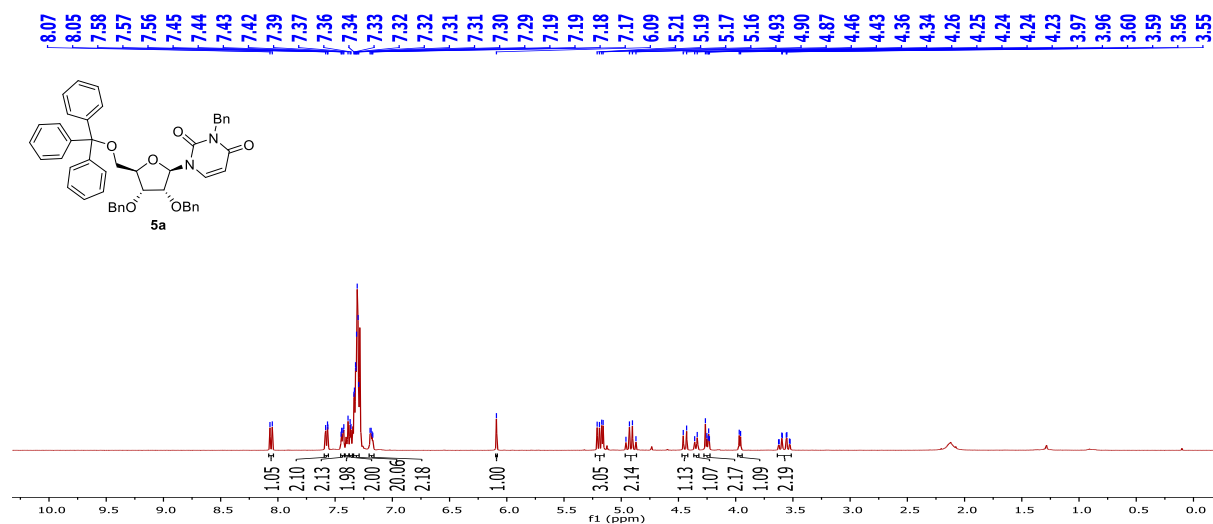



**<sup>1</sup>H NMR (400 MHz, CDCl<sub>3</sub>) of 5b**

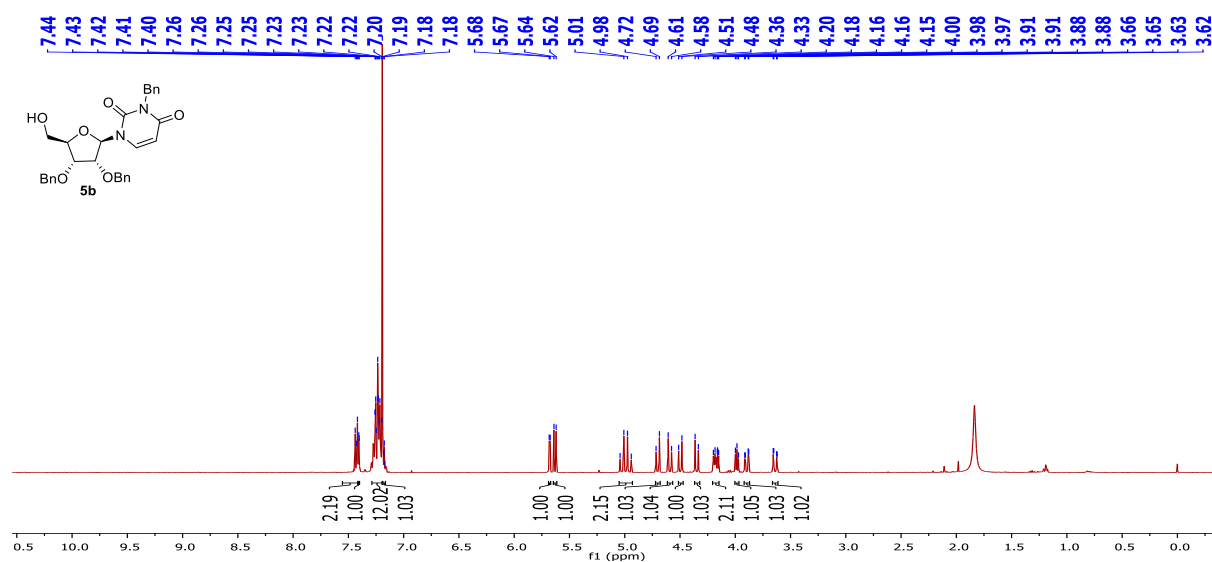

**<sup>13</sup>C NMR (400 MHz, CDCl<sub>3</sub>) of 5b**

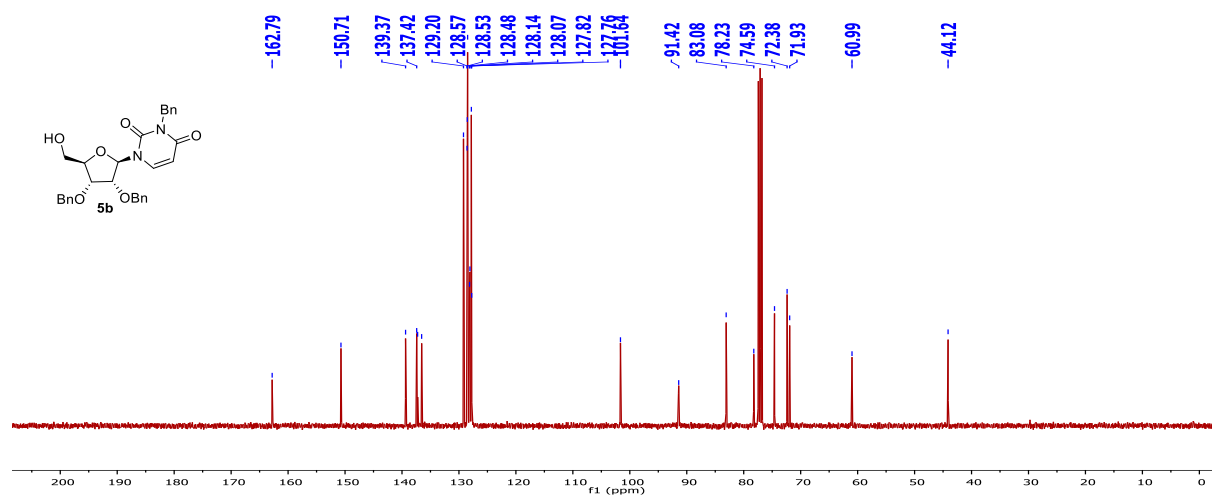

**DEPT 135 (101 MHz, CDCl<sub>3</sub>) of 5b**

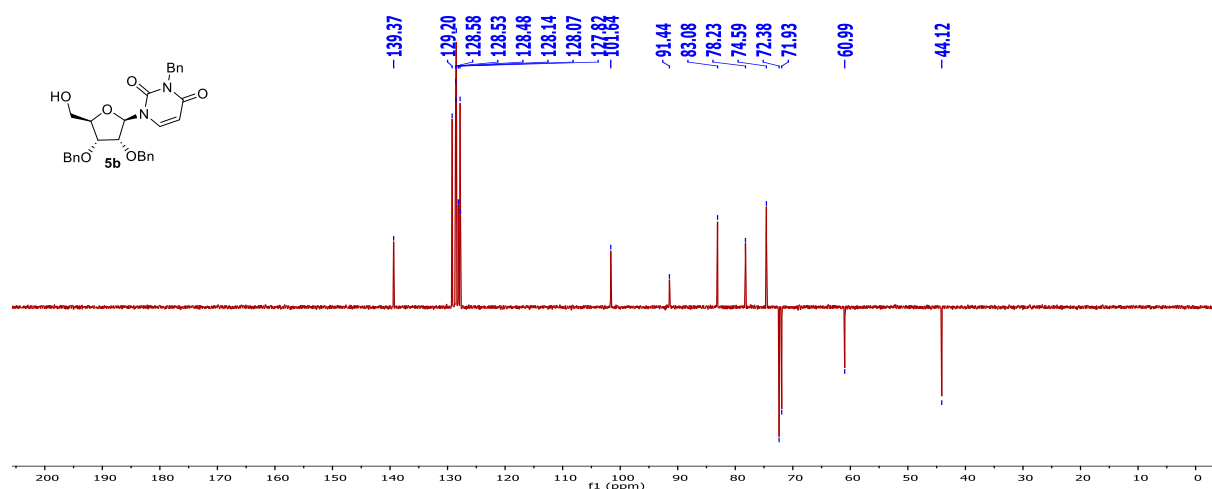



**$^1\text{H}$  NMR (400 MHz,  $\text{CDCl}_3$ ) of 5c**

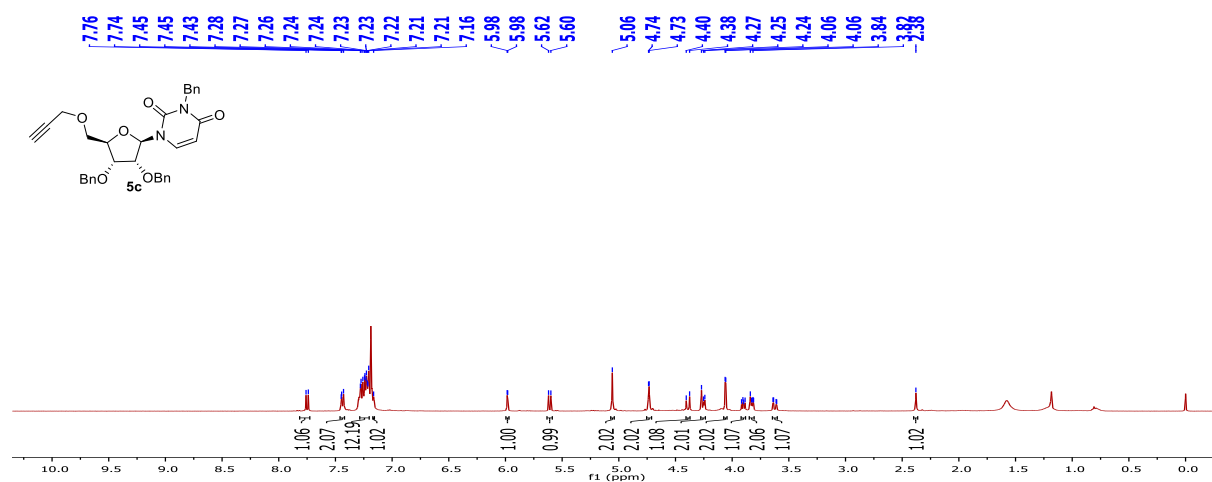

**$^{13}\text{C}$  NMR (400 MHz,  $\text{CDCl}_3$ ) of 5c**

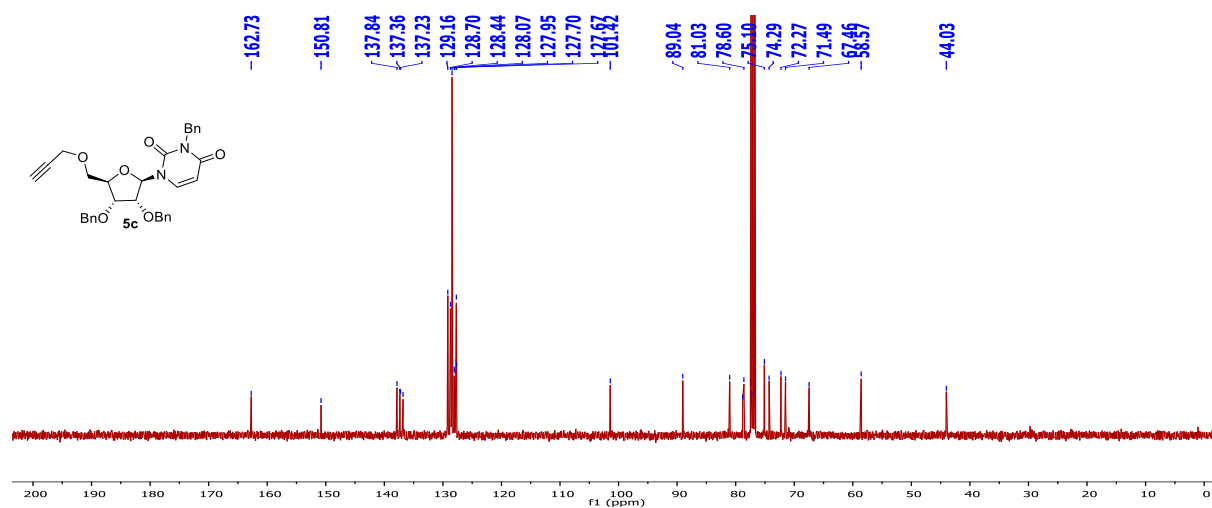

**DEPT 135 (101 MHz,  $\text{CDCl}_3$ ) of 5c**

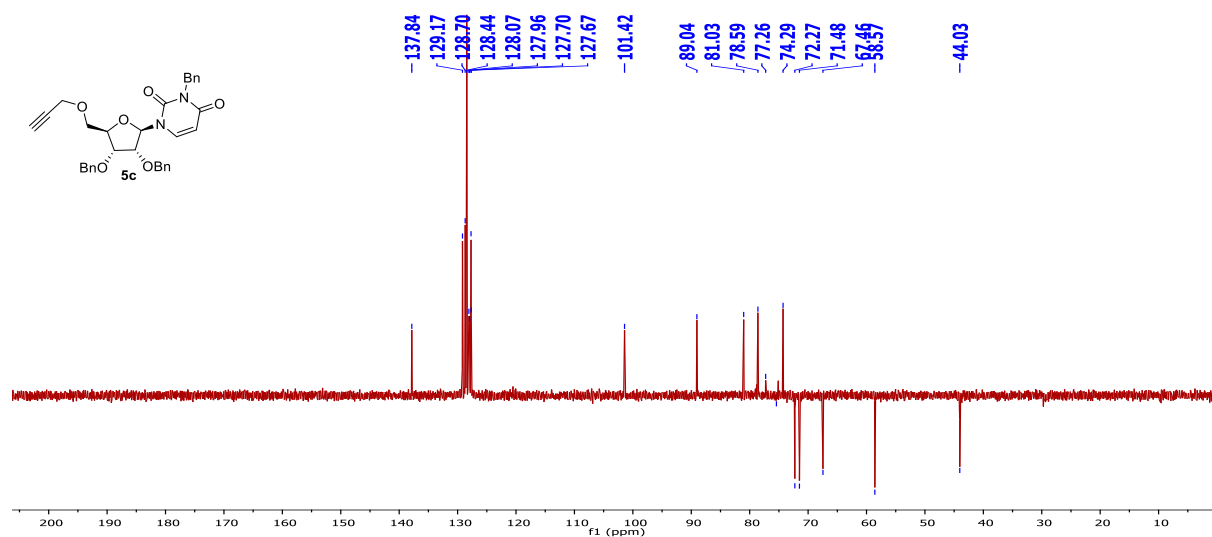



**$^1\text{H}$  NMR (400 MHz,  $\text{CDCl}_3$ ) of 5d**

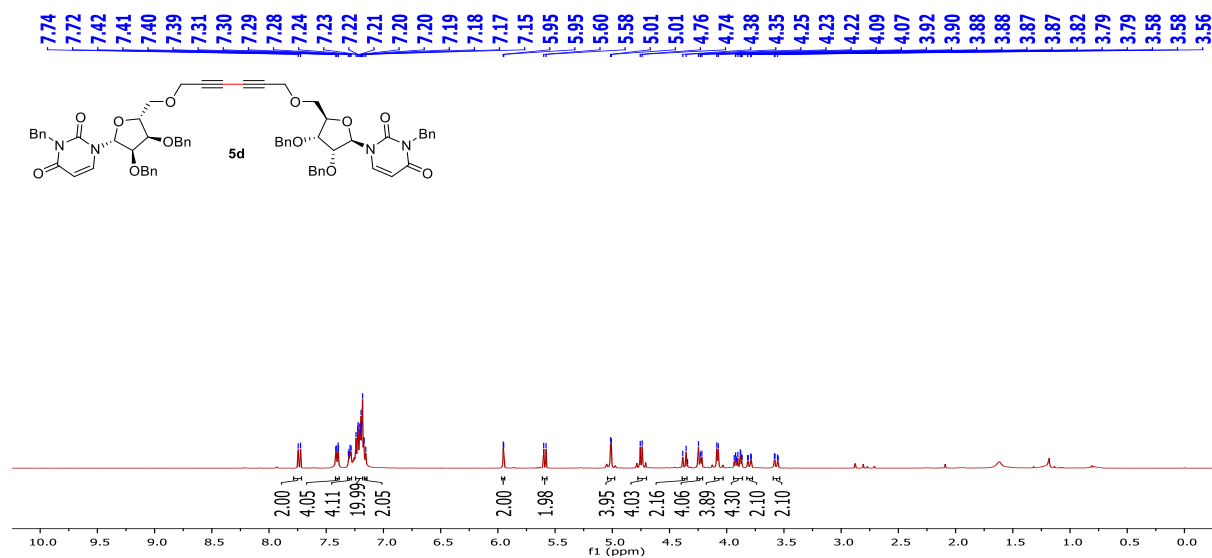

**$^{13}\text{C}$  NMR (400 MHz,  $\text{CDCl}_3$ ) of 5d**

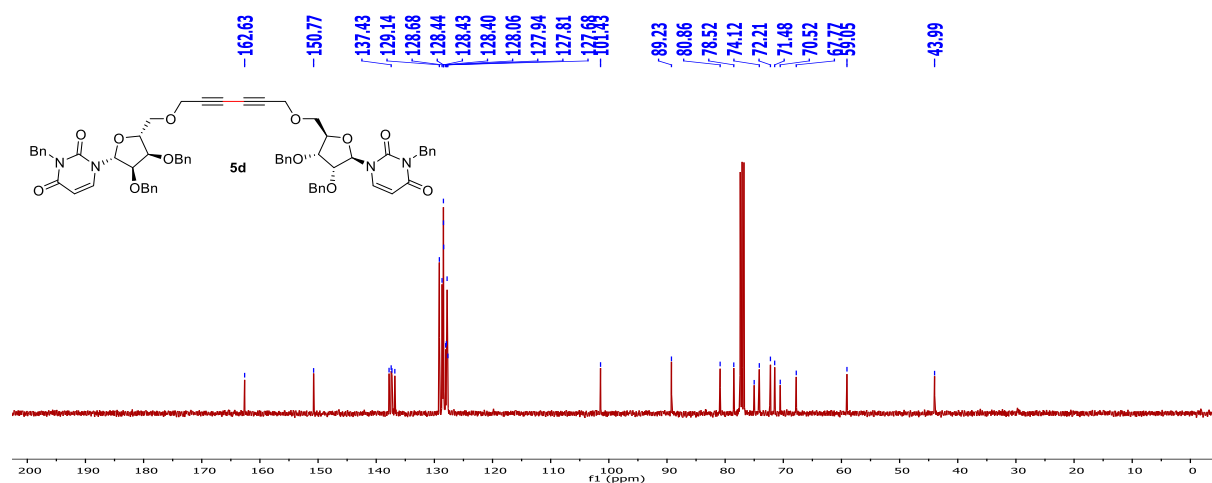

**DEPT 135 (101 MHz,  $\text{CDCl}_3$ ) of 5d**

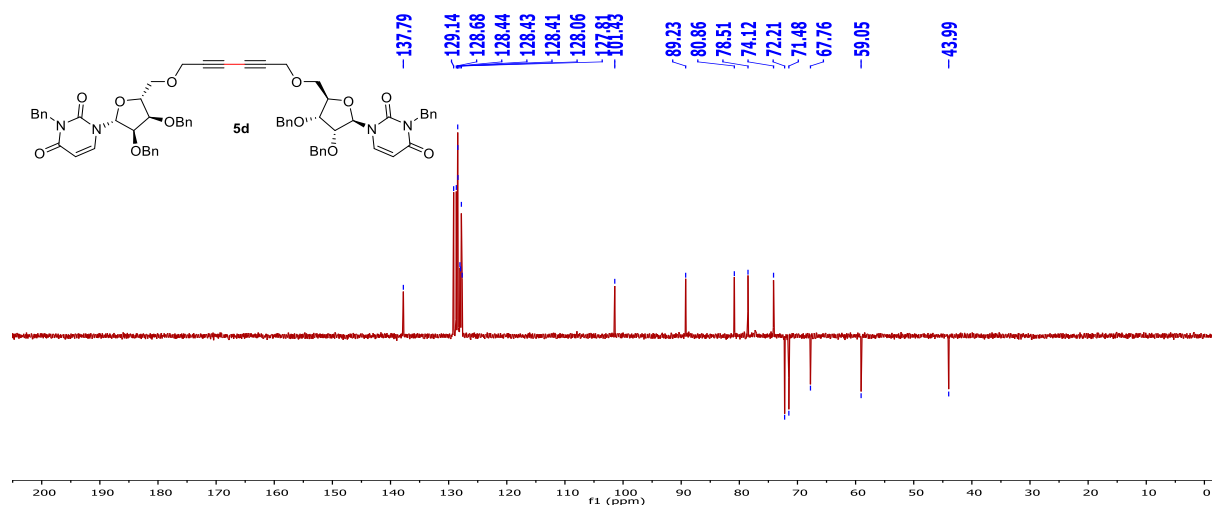

Supplement: d4ob01872a1.pdf [file d4ob01872a1.pdf]
